# Supplementary material for: Sequence and Analysis of the Genome of the Pathogenic Yeast Candida orthopsilosis
Source: PLoS One. 2012 Apr 26;7(4):e35750. doi: 10.1371/journal.pone.0035750 (PMC3338533; doi:10.1371/journal.pone.0035750)
Supplement: Table S1 — Intron information for C. orthopsilosis . (XLS) [file pone.0035750.s006.xls]

## Sheet: Copy of Co info
Table S1. List of all annotated C. orthopsilosis genes with one or more introns in the coding sequence (CDS).
C. orthopsilosis ID	coordinates in C. orthopsilosis	#introns in C. orthopsilosis	C. parapsilosis ortholog	#introns in C. parapsilosis	C. albicans ortholog
CORT0A00560	complement(join(117852..118085,118385..118447))	1	cpar2_800470	1	orf19.7509.1
CORT0A00570	complement(join(118865..118887,118953..119169))	1	cpar2_800480	1	orf19.7509.2
CORT0A00720	join(163747..163767,163827..164486)	1	cpar2_800640	1	orf19.2598
CORT0A00810	complement(join(181852..182528,182583..182589))	1	cpar2_800730	1	orf19.2614
CORT0A00950	join(209801..209803,209863..210375)	1	cpar2_800880	1	orf19.3251
CORT0A01330	complement(join(289447..291000,291065..291181))	1	cpar2_801270	1	orf19.3735
CORT0A01520	join(335274..335282,335338..336330)	1	cpar2_801460	1	orf19.2613
CORT0A01930	complement(join(437885..438169,438402..438512))	1	cpar2_801880	1	orf19.4931.1
CORT0A02060	join(475116..475202,475327..476640)	1	cpar2_802010	1	orf19.4393
CORT0A02090	complement(join(480897..482655,482720..482769))	1	cpar2_802040	1	orf19.2379
CORT0A02250	join(503334..503935,503986..504023,504105..504823)	2	cpar2_802200	2	orf19.2393
CORT0A02270	join(506640..506874,506937..507658)	1	cpar2_802220	1	orf19.2397.3
CORT0A02570	join(564681..564683,564762..565190)	1	cpar2_802520	1	orf19.2416.1
CORT0A02620	complement(join(570514..570967,571020..571126))	1	cpar2_802570	1	orf19.2863.1
CORT0A02640	complement(join(572369..572769,573085..573133))	1	cpar2_802590	1	orf19.2864.1
CORT0A02660	complement(join(575004..576908,576967..577047))	1	cpar2_802610	1	orf19.2423
CORT0A02730	complement(join(594410..594789,595672..596980))	1	cpar2_802670	1	orf19.171
CORT0A02870	join(628214..628216,628273..629817)	1	cpar2_802830	1	orf19.2546
CORT0A03030	complement(join(650914..651180,651232..651234))	1	cpar2_803070	1	orf19.2533.1
CORT0A03150	join(675870..675873,675980..676272)	1	cpar2_803140	1	orf19.3223.1
CORT0A03160	join(676783..676832,676983..677832)	1	cpar2_803150	1	orf19.3223
CORT0A03310	complement(join(715379..716056,716106..716144))	1	cpar2_803290	1	orf19.2318.1
CORT0A03330	join(717866..718081,718133..718567)	1	cpar2_803310	1	orf19.2322.3
CORT0A03420	complement(join(738229..738617,738962..738971))	1	cpar2_803400	1	orf19.6265.1
CORT0A03440	join(740032..740037,740307..740456)	1	cpar2_803420	1	orf19.6264.4
CORT0A03450	complement(join(741009..741518,741577..741600))	1	cpar2_803430	1	orf19.6264.3
CORT0A03590	join(772452..772493,772553..776557)	1	cpar2_803570	1	orf19.1840
CORT0A03650	join(788276..788305,788562..789629)	1	cpar2_803630	1	orf19.4826
CORT0A03960	complement(join(866543..867188,867246..867463))	1	cpar2_803930	1	orf19.4723
CORT0A04040	complement(join(877406..877582,877637..878317))	1	cpar2_804010	1	orf19.3273
CORT0A04450	complement(join(951397..952156,952215..952228))	1	cpar2_804440	1	orf19.4730
CORT0A04510	join(968806..968836,969636..972373)	1	cpar2_804520	1	orf19.1139
CORT0A04720	join(1023433..1023497,1023559..1024000)	1	cpar2_804710	1	orf19.5104
CORT0A05510	join(1212638..1212644,1212710..1213077)	1	cpar2_403980	1	orf19.4879.2
CORT0A05700	join(1259041..1259057,1259116..1259144,1259207..1259916)	2	cpar2_206350	2	no_id
CORT0A05790	complement(join(1282469..1282924,1283100..1283591))	1	cpar2_206430	1	orf19.3559
CORT0A06590	join(1457716..1457737,1457788..1458314)	1	cpar2_207230	1	orf19.393
CORT0A06670	complement(join(1476465..1476782,1477078..1477188))	1	cpar2_207320	1	orf19.4909.1
CORT0A06820	join(1507808..1507865,1507923..1508509)	1	cpar2_207470	1	orf19.5249
CORT0A07040	complement(join(1559621..1563022,1563080..1563292))	1	cpar2_207690	1	orf19.1474
CORT0A07240	join(1612313..1612319,1612666..1612931)	1	cpar2_207910	1	orf19.667.1
CORT0A08060	join(1793875..1793919,1793998..1794402)	1	cpar2_208780	1	orf19.2782
CORT0A08120	complement(join(1807059..1807370,1807434..1807439))	1	cpar2_208850	1	orf19.6198.1
CORT0A08190	complement(join(1825698..1825778,1825835..1825922,1825975..1828591,1828650..1828698))	3	cpar2_208920	3	orf19.6222
CORT0A08200	complement(join(1828884..1829203,1829575..1829611))	1	cpar2_208930	1	orf19.6220.4
CORT0A08210	complement(join(1830228..1830556,1830636..1830696,1830754..1830789))	2	cpar2_208940	2	orf19.6220.3
CORT0A08620	join(1910712..1910714,1910926..1911696)	1	cpar2_209350	1	orf19.2311
CORT0A08640	join(1912988..1913091,1913166..1913919)	1	cpar2_209370	1	orf19.2310
CORT0A08650	complement(join(1913997..1914757,1914926..1914929))	1	cpar2_209380	1	orf19.2309.2
CORT0A08680	complement(join(1922422..1922706,1923090..1923143))	1	cpar2_209410	1	orf19.3572.3
CORT0A08720	join(1929731..1929749,1930063..1930367)	1	cpar2_209450	1	orf19.6882.1
CORT0A08800	complement(join(1941434..1943947,1944003..1944053))	1	cpar2_209530	1	orf19.6891
CORT0A08850	join(1957109..1957155,1957225..1958593)	1	cpar2_209580	1	orf19.4127
CORT0A08870	complement(join(1959983..1961225,1961321..1961355))	1	cpar2_209600	1	orf19.4128
CORT0A09160	complement(join(2028078..2029003,2029053..2029182))	1	cpar2_209900	1	orf19.5212
CORT0A09180	complement(join(2031167..2031307,2031745..2031801))	1	cpar2_209920	1	orf19.5210.1
CORT0A09250	complement(join(2046173..2046786,2046840..2046870))	1	cpar2_209990	1	orf19.3534
CORT0A09550	complement(join(2106508..2107650,2107717..2107782))	1	cpar2_210250	1	orf19.1494
CORT0A09840	join(2178733..2178813,2178863..2179252)	1	cpar2_210510	1	orf19.4720
CORT0A09870	complement(join(2184401..2184811,2185024..2185026))	1	cpar2_210540	1	orf19.2329.1
CORT0A09950	join(2195502..2195507,2195579..2197717)	1	cpar2_210620	1	orf19.1496
CORT0A09970	join(2199825..2199878,2199933..2200454)	1	cpar2_210640	1	orf19.5817
CORT0A10180	complement(join(2229431..2230716,2230776..2230851))	1	cpar2_210830	1	orf19.1553
CORT0A10420	complement(join(2276126..2276899,2277016..2277024))	1	cpar2_211070	1	orf19.798
CORT0A10480	join(2288860..2290630,2292634..2293868)	1	cpar2_211130	1	orf19.792
CORT0A10530	join(2302470..2302610,2302677..2302937)	1	cpar2_211180	1	orf19.837.1
CORT0A10550	join(2305175..2305181,2305686..2306257)	1	cpar2_211200	1	orf19.838.1
CORT0A10560	join(2306684..2306694,2307077..2307548)	1	cpar2_211210	1	orf19.840
CORT0A10640	complement(join(2322632..2322727,2322794..2322868,2322933..2323004,2323070..2323099))	3	cpar2_211300	3	orf19.836.1
CORT0A10720	join(2339739..2339751,2340151..2340437)	1	cpar2_211390	1	orf19.827.1
CORT0A10820	join(2374777..2374946,2375004..2375286)	1	cpar2_211480	1	orf19.873.1
CORT0A10970	join(2399877..2399880,2400092..2402616)	1	cpar2_211630	1	orf19.5788
CORT0A11040	complement(join(2418641..2418668,2418729..2418880,2418942..2418989))	2	cpar2_211700	2	orf19.909.1
CORT0A11310	join(2492462..2492477,2492549..2493609)	1	cpar2_211970	1	orf19.1517
CORT0A11800	join(2602713..2603292,2603352..2603410)	1	cpar2_212480	1	orf19.827
CORT0A11930	join(2625738..2625745,2625807..2626017)	1	cpar2_212610	1	orf19.2343.1
CORT0A11980	join(2639173..2639190,2639248..2642310)	1	cpar2_212680	1	orf19.4437
CORT0A12130	complement(join(2668971..2669095,2669154..2669349))	1	cpar2_212830	1	orf19.2018.1
CORT0A12210	join(2684314..2684361,2684415..2685044)	1	cpar2_212910	1	orf19.2031
CORT0A12410	join(2710746..2710766,2710874..2710910,2710966..2713814)	2	cpar2_213100	2	orf19.2051
CORT0A12480	join(2727967..2728030,2728310..2728449)	1	cpar2_213170	1	orf19.2066.1
CORT0A12520	complement(join(2733378..2735077,2735135..2735168))	1	cpar2_213210	1	orf19.2070
CORT0A12640	join(2760967..2760994,2761048..2761844)	1	cpar2_213330	1	orf19.2089
CORT0A12730	complement(join(2774184..2777102,2777159..2777194))	1	cpar2_213420	1	orf19.2094
CORT0A12770	join(2785802..2785838,2785898..2788743)	1	cpar2_213460	1	orf19.2099
CORT0A12850	join(2797830..2797902,2797957..2799047)	1	cpar2_213520	1	orf19.2107
CORT0A13060	complement(join(2840211..2842052,2842126..2842239))	1	cpar2_213730	1	orf19.1923
CORT0A13180	complement(join(2864348..2866460,2866520..2866542))	1	cpar2_213770	1	orf19.2012
CORT0A13390	complement(join(2914812..2915065,2915159..2915180))	1	cpar2_214070	1	orf19.1448.1
CORT0B00460	complement(join(76810..77261,77365..77377))	1	cpar2_500330	1	no_id
CORT0B00530	complement(join(86715..87166,87312..87324))	1	cpar2_500390	1	orf19.2770.1
CORT0B00650	join(118415..118426,118483..119943)	1	cpar2_500510	1	orf19.1238
CORT0B01100	join(226848..226859,227234..227587)	1	cpar2_500930	1	orf19.1409.1
CORT0B01400	complement(join(291593..292039,292093..292095))	1	cpar2_501240	1	orf19.3140.1
CORT0B01610	complement(join(342970..343416,343567..343569))	1	cpar2_501460	1	orf19.4413
CORT0B01670	complement(join(355407..356197,356249..356285))	1	cpar2_501520	1	orf19.4406
CORT0B01840	join(403287..403331,403666..404088)	1	cpar2_501680	1	orf19.4149.1
CORT0B01860	complement(join(406136..408127,408198..408401))	1	cpar2_501700	1	orf19.4151
CORT0B01980	join(428940..429021,429086..429528)	1	cpar2_501830	1	orf19.1967
CORT0B02140	complement(join(451275..451658,451714..451722))	1	cpar2_501980	1	orf19.4340.1
CORT0B02200	complement(join(457354..457490,457550..457775,457833..457844))	2	cpar2_502040	2	orf19.2639.1
CORT0B02260	complement(join(468916..470321,470650..470818))	1	cpar2_502100	1	orf19.6656
CORT0B02420	join(501027..501058,501111..502080)	1	cpar2_502240	1	orf19.3211
CORT0B02620	join(550627..550798,550875..553075)	1	cpar2_502430	1	orf19.3991
CORT0B02820	join(585761..585781,585845..587215)	1	cpar2_502720	1	orf19.4002
CORT0B03230	join(690779..690818,690880..691847)	1	cpar2_101930	1	orf19.1730
CORT0B03435	join(744446..744448,744750..744962)	1	cpar2_102130	1	no_Ca
CORT0B03740	join(818803..818867,818923..819349)	1	cpar2_102500	1	orf19.297
CORT0B03800	join(827792..827794,827872..828057)	1	cpar2_102440	1	orf19.242.2
CORT0B04100	join(893469..893493,893640..894613)	1	cpar2_102830	1	orf19.238
CORT0B04120	join(895999..896049,896104..896922)	1	cpar2_102850	1	orf19.234
CORT0B04130	complement(join(897042..897262,897328..897417,897469..897499))	2	cpar2_102860	2	orf19.233.1
CORT0B04160	join(901682..901683,901747..901927)	1	cpar2_102890	1	orf19.227
CORT0B04170	complement(join(902495..903649,903709..903747))	1	cpar2_102900	1	orf19.229
CORT0B04400	complement(join(950196..950769,950829..950944))	1	cpar2_103170	1	orf19.5854
CORT0B04410	complement(join(951412..951813,951866..951922))	1	cpar2_103180	1	orf19.913.2
CORT0B04620	join(1001385..1001478,1001555..1002123)	1	cpar2_103410	1	orf19.337
CORT0B05000	join(1086799..1086807,1086931..1087158)	1	cpar2_103800	1	orf19.2439.1
CORT0B05120	complement(join(1109741..1109887,1109936..1111453))	1	cpar2_103920	1	no_id
CORT0B05300	join(1141947..1141949,1142003..1142902)	1	cpar2_104090	1	orf19.6866
CORT0B05320	complement(join(1144232..1144880,1144931..1144980))	1	cpar2_104110	1	orf19.3582
CORT0B05340	complement(join(1146327..1146960,1147023..1147042))	1	cpar2_104130	1	orf19.3579
CORT0B05360	join(1147801..1147846,1147887..1151236)	1	cpar2_104140	1	orf19.810
CORT0B05610	complement(join(1195368..1195889,1196192..1196194))	1	cpar2_104370	1	orf19.2232
CORT0B05640	join(1202576..1202578,1202659..1203204)	1	cpar2_104410	1	orf19.2237.1
CORT0B05800	join(1240858..1241308,1241472..1242586)	1	cpar2_104580	1	orf19.18
CORT0B05910	join(1267134..1267151,1267483..1267797)	1	cpar2_104710	1	orf19.5491.1
CORT0B05960	complement(join(1274191..1274521,1274583..1274587))	1	cpar2_104760	1	orf19.5486.1
CORT0B06450	join(1368019..1368038,1368094..1369066)	1	cpar2_105250	1	orf19.6846
CORT0B06540	complement(join(1388036..1388757,1388808..1388844))	1	cpar2_105330	1	orf19.5194.1
CORT0B06550	complement(join(1388979..1390404,1390594..1390736,1390975..1391049))	2	cpar2_105340	2	orf19.6854
CORT0B06710	join(1417676..1417788,1417855..1420489)	1	cpar2_105490	1	orf19.768
CORT0B07040	join(1490475..1490576,1490677..1491030)	1	cpar2_105830	1	orf19.6062.3
CORT0B07050	complement(join(1491105..1492486,1492545..1492557))	1	cpar2_105840	1	orf19.6063
CORT0B07090	complement(join(1499305..1500606,1500702..1500737,1501025..1501036))	2	cpar2_105880	2	orf19.6034
CORT0B07180	complement(join(1522529..1522936,1523211..1523231))	1	cpar2_105960	1	orf19.2994.1
CORT0B07560	join(1585063..1585081,1585167..1585531)	1	cpar2_106320	1	orf19.3690.2
CORT0B07650	complement(join(1607318..1609194,1609253..1609277))	1	cpar2_106410	1	orf19.2930
CORT0B08240	complement(join(1712418..1712901,1712967..1713391))	1	cpar2_107040	1	orf19.1058
CORT0B08260	join(1715183..1715192,1715257..1716590)	1	cpar2_107060	1	orf19.1055
CORT0B08390	join(1735656..1735658,1735722..1736822)	1	cpar2_107190	1	orf19.1039
CORT0B08660	join(1794924..1794957,1795024..1795397)	1	cpar2_107460	1	orf19.2480.1
CORT0B08670	join(1796227..1796234,1796626..1796737,1796929..1797555)	2	cpar2_107470	2	orf19.2478.1
CORT0B08780	complement(join(1818466..1818917,1818974..1819016))	1	cpar2_107590	1	orf19.410.3
CORT0B08800	join(1822305..1822314,1822396..1823906)	1	cpar2_107610	1	orf19.412
CORT0B09110	complement(join(1884001..1884239,1884302..1884329))	1	cpar2_107920	1	orf19.446.2
CORT0B09120	complement(join(1884890..1885086,1885176..1885215))	1	cpar2_107930	1	orf19.446.1
CORT0B09200	complement(join(1905531..1906016,1906075..1906194))	1	cpar2_108020	1	orf19.57
CORT0B09340	join(1943563..1943590,1943850..1944091)	1	cpar2_108200	1	orf19.3663.1
CORT0B09430	complement(join(1966330..1966571,1966666..1966693))	1	cpar2_108330	1	no_id
CORT0B09530	complement(join(1999691..1999740,1999795..1999936))	1	cpar2_108440	1	orf19.2965.1
CORT0B09610	complement(join(2009533..2010129,2010184..2010219))	1	cpar2_108520	1	orf19.3007.2
CORT0B09650	complement(join(2014525..2015753,2016315..2016375))	1	cpar2_108560	1	orf19.3010.1
CORT0B09670	complement(join(2023189..2024353,2024507..2024547))	1	cpar2_108580	1	orf19.3013
CORT0B09730	join(2033329..2033355,2033405..2034508)	1	cpar2_108640	1	orf19.3021
CORT0B10060	join(2101878..2102010,2102260..2102519)	1	cpar2_108950	1	orf19.3061.1
CORT0B10100	complement(join(2105440..2107081,2107134..2107207))	1	cpar2_108990	1	orf19.3055
CORT0B10160	join(2115532..2115573,2115726..2118602)	1	cpar2_109060	1	orf19.4545
CORT0B10240	complement(join(2129819..2130058,2130469..2130492))	1	cpar2_109170	1	orf19.3325.3
CORT0B10460	complement(join(2177252..2177861,2177926..2177942))	1	cpar2_109380	1	orf19.3351
CORT0B10535	complement(join(2197330..2197549,2197753..2197766))	1	cpar2_109480	1	orf19.3354
CORT0B10600	join(2213037..2213078,2213154..2214245)	1	cpar2_109530	1	orf19.6105
CORT0B11110	complement(join(2328018..2328333,2328392..2328444))	1	cpar2_110000	1	orf19.6010.1
CORT0B11120	join(2329227..2329285,2329342..2329388,2329446..2329573,2329631..2333683)	3	cpar2_110010	3	orf19.6011
CORT0B11140	complement(join(2337823..2338076,2338131..2338536,2338594..2338689,2338745..2338786))	3	cpar2_110030	3	orf19.6013
CORT0B11390	complement(join(2388705..2389272,2389333..2389361))	1	cpar2_110280	1	orf19.3001
CORT0B11410	join(2391460..2391474,2391611..2395981)	1	cpar2_110300	1	orf19.3003
CORT0B11420	join(2396927..2396938,2397210..2397728)	1	cpar2_110310	1	orf19.3003.1
CORT0B11490	join(2412233..2412244,2412302..2414062)	1	cpar2_110380	1	orf19.1032
CORT0C00240	join(34045..34106,34160..35093)	1	cpar2_808910	1	orf19.6786
CORT0C00250	complement(join(35247..35643,35723..35739))	1	cpar2_808900	1	orf19.6787
CORT0C00580	join(115428..115430,115495..116364)	1	cpar2_808580	1	orf19.6822
CORT0C01000	complement(join(206829..207531,207585..207637))	1	cpar2_808150	1	orf19.6718
CORT0C01160	join(245889..245903,245956..246906)	1	cpar2_807990	1	orf19.6747
CORT0C01230	join(258497..258558,258624..260043)	1	cpar2_807920	1	orf19.6738
CORT0C01270	complement(join(266594..267877,267936..268877))	1	cpar2_807860	1	orf19.6187
CORT0C01370	complement(join(280831..281435,281489..281504))	1	cpar2_807760	1	orf19.6753
CORT0C01470	complement(join(300662..301468,301520..301747))	1	cpar2_807660	1	orf19.1647
CORT0C01580	join(318825..318837,319127..319542)	1	cpar2_807560	1	orf19.5927
CORT0C01610	complement(join(322657..323743,324507..325093))	1	cpar2_807530	1	orf19.1658
CORT0C01720	complement(join(350358..351140,351473..351490))	1	cpar2_807420	1	orf19.5943.1
CORT0C01930	complement(join(414779..415078,415138..415170))	1	cpar2_807220	1	orf19.7360
CORT0C02250	join(480039..480070,480129..480831)	1	cpar2_806920	1	orf19.6998
CORT0C02260	join(481590..481642,481698..482448)	1	cpar2_806910	1	orf19.356
CORT0C02350	join(506366..506564,507471..507637)	1	cpar2_806820	1	orf19.7382
CORT0C02910	complement(join(642086..643159,643293..643298))	1	cpar2_806230	1	orf19.2173
CORT0C03000	complement(join(658987..659318,659375..659387))	1	cpar2_806140	1	orf19.5876
CORT0C03050	join(668370..668383,668599..669067)	1	cpar2_806090	1	orf19.5886
CORT0C03090	join(678528..678576,678773..679365)	1	cpar2_806050	1	orf19.5893
CORT0C03190	complement(join(702539..703115,703440..703441))	1	cpar2_805960	1	orf19.5904
CORT0C03230	join(711650..711680,711814..711953)	1	cpar2_805920	1	no_id
CORT0C03310	join(736401..736415,736495..737364)	1	cpar2_805840	1	orf19.5870
CORT0C03320	complement(join(737456..738580,738733..738750))	1	cpar2_805830	1	orf19.5869
CORT0C03410	join(761537..761554,761613..762944)	1	cpar2_805740	1	orf19.2167
CORT0C03430	join(763490..763540,763698..764180)	1	cpar2_805730	1	orf19.2168.3
CORT0C03460	join(772505..772571,772681..775451)	1	cpar2_805700	1	orf19.1604
CORT0C03610	complement(join(826956..827234,827332..827376))	1	cpar2_404200	1	orf19.7436.1
CORT0C03810	join(868978..869274,870042..870419)	1	cpar2_404400	1	orf19.5917.3
CORT0C04060	join(919590..919603,919663..920749)	1	cpar2_404640	1	orf19.7428
CORT0C04110	join(932609..932731,932815..933216)	1	cpar2_404680	1	no_id
CORT0C04300	complement(join(974645..975783,975838..975853))	1	cpar2_404880	1	orf19.1634
CORT0C04460	join(1008551..1008569,1008631..1010963)	1	cpar2_405050	1	orf19.1624
CORT0C04500	join(1013673..1013676,1013759..1013803,1013861..1016220)	2	cpar2_405090	2	orf19.1630
CORT0C04540	complement(join(1022236..1024390,1024452..1024456))	1	cpar2_405140	1	orf19.1618
CORT0C04720	complement(join(1077299..1077719,1077981..1078000))	1	cpar2_405310	1	orf19.5996.1
CORT0C04740	complement(join(1080161..1080609,1080989..1081100))	1	cpar2_405330	1	orf19.5982
CORT0C04760	complement(join(1082625..1083189,1083247..1083263))	1	cpar2_405350	1	orf19.5985
CORT0C04970	join(1143118..1143120,1143431..1143790)	1	cpar2_405570	1	orf19.5964.2
CORT0C04980	complement(join(1144006..1147209,1147275..1147292))	1	cpar2_405580	1	orf19.5965
CORT0C05050	complement(join(1157128..1157729,1157782..1158679))	1	cpar2_405650	1	orf19.5954
CORT0C05090	complement(join(1163251..1163946,1164224..1164313))	1	cpar2_405680	1	orf19.6975
CORT0C05250	join(1216054..1216130,1216880..1217606)	1	cpar2_405840	1	orf19.1750
CORT0C05320	join(1229101..1229123,1229190..1229409)	1	cpar2_405920	1	orf19.4090.1
CORT0C05530	join(1263120..1263245,1263298..1264917)	1	cpar2_406130	1	orf19.1400
CORT0C05690	join(1297260..1297832,1297886..1298581)	1	cpar2_406290	1	no_id
CORT0C06070	complement(join(1370648..1371701,1371759..1371808))	1	cpar2_406660	1	orf19.2257
CORT0C06900	complement(join(1548621..1548928,1549309..1549360))	1	cpar2_407550	1	orf19.2179.2
CORT0C07090	join(1594386..1594408,1594460..1596671)	1	cpar2_407750	1	orf19.5348
CORT0C07220	join(1613323..1613338,1613389..1613903)	1	cpar2_407880	1	orf19.5342.1
CORT0D00640	complement(join(78708..79826,79936..79956))	1	cpar2_200560	1	orf19.7600
CORT0D00840	join(115904..115994,116049..116356)	1	cpar2_200750	1	orf19.7576
CORT0D00870	complement(join(125401..125800,126246..126289))	1	cpar2_200780	1	orf19.7571
CORT0D01030	complement(join(173643..176155,176210..176417))	1	cpar2_200980	1	orf19.7339
CORT0D01050	complement(join(179040..180022,180077..180092))	1	cpar2_201000	1	orf19.7341
CORT0D01120	complement(join(192238..193250,193309..193336))	1	cpar2_201070	1	orf19.2835
CORT0D01180	complement(join(200065..200862,200917..200922))	1	cpar2_201130	1	orf19.6604
CORT0D01320	join(218142..218157,218209..219368)	1	cpar2_201270	1	orf19.7292
CORT0D01360	join(231045..231119,231170..231739)	1	cpar2_201310	1	orf19.6340
CORT0D01610	complement(join(277724..277972,278041..278121))	1	cpar2_201560	1	orf19.5006.1
CORT0D01620	join(279856..279865,280454..281574)	1	cpar2_201570	1	orf19.5007
CORT0D01750	join(299734..299744,299799..300201)	1	cpar2_201690	1	orf19.6358
CORT0D01810	join(306321..306403,306455..306776)	1	cpar2_201750	1	orf19.68.2
CORT0D01930	join(333764..333868,333921..334016,334069..334842)	2	cpar2_201870	2	orf19.3760
CORT0D02060	complement(join(373937..374395,374447..374449))	1	cpar2_202020	1	orf19.2621
CORT0D02370	join(427404..427953,428012..428049)	1	cpar2_202320	1	orf19.485
CORT0D02420	join(433642..433675,433747..434366)	1	cpar2_202370	1	orf19.479.2
CORT0D02580	join(468336..468352,468410..469388)	1	cpar2_202510	1	orf19.4378
CORT0D02630	join(477555..477557,477940..478122)	1	cpar2_202550	1	orf19.4375.1
CORT0D02710	join(491548..491638,491716..492104)	1	cpar2_202630	1	orf19.4952.1
CORT0D02730	complement(join(493726..495179,495248..495320))	1	cpar2_202650	1	orf19.4955
CORT0D02980	join(552199..552217,552281..552579)	1	cpar2_202900	1	orf19.4967
CORT0D02990	complement(join(552692..557085,557139..557142))	1	cpar2_202910	1	orf19.4969
CORT0D03290	join(627976..628012,628084..629105)	1	cpar2_203190	1	orf19.1856
CORT0D03350	complement(join(637151..637363,637423..637425))	1	cpar2_203260	1	orf19.1848.1
CORT0D03630	complement(join(691505..692978,693486..693520))	1	cpar2_203520	1	orf19.5024
CORT0D03790	complement(join(734522..737373,737426..737441))	1	cpar2_203680	1	orf19.1166
CORT0D03810	join(738449..738479,738528..738883)	1	cpar2_203700	1	orf19.1162.1
CORT0D03870	complement(join(749428..749673,749760..749819))	1	cpar2_203760	1	orf19.4862.2
CORT0D03940	join(764416..764469,764537..766000)	1	cpar2_203830	0	orf19.1738
CORT0D03940	join(764416..764469,764537..766000)	1	cpar2_203830	0	orf19.1738
CORT0D04210	join(812573..812591,812645..812952)	1	cpar2_204110	1	orf19.6313.2
CORT0D04320	complement(join(840124..840841,840940..840974))	1	cpar2_204240	1	orf19.544.1
CORT0D04850	join(950446..950478,950802..952016)	1	cpar2_204740	1	orf19.1860
CORT0D04920	join(961928..961931,961981..962765)	1	cpar2_204810	1	orf19.703
CORT0D05830	complement(join(1171547..1171745,1171829..1171920))	1	cpar2_205710	1	orf19.6419.1
CORT0D05980	join(1200598..1200615,1200859..1201326)	1	cpar2_205860	1	orf19.6414.3
CORT0D07070	complement(join(1456742..1460182,1460240..1460242))	1	cpar2_503580	1	orf19.1680
CORT0D07220	complement(join(1483127..1483639,1483694..1483708))	1	cpar2_503710	1	orf19.1702
CORT0D07290	complement(join(1503810..1504173,1504232..1504242))	1	cpar2_503820	1	orf19.5394.1
CORT0D07630	complement(join(1583472..1583876,1584123..1584125))	1	cpar2_504170	1	orf19.5466
CORT0E00360	join(73807..73817,73884..74580)	1	cpar2_400350	1	orf19.2711.1
CORT0E00380	complement(join(77018..78967,79016..79435))	1	cpar2_400330	1	orf19.2713
CORT0E00840	complement(join(162696..162887,163014..163025))	1	cpar2_400800	1	orf19.2707.1
CORT0E00970	join(195044..195140,195197..195999)	1	cpar2_400930	2	orf19.4647
CORT0E00970	join(195044..195140,195197..195999)	1	cpar2_400930	2	orf19.4647
CORT0E01650	complement(join(357061..357924,358086..358148))	1	cpar2_401600	1	orf19.4565
CORT0E01840	complement(join(395710..396027,396178..396180))	1	cpar2_401800	1	orf19.3788.1
CORT0E01890	join(406812..407383,407434..408679)	1	cpar2_401850	1	orf19.2509
CORT0E02000	complement(join(430325..430880,431207..431289))	1	cpar2_401960	1	orf19.3838
CORT0E02010	complement(join(431508..433263,433326..433375))	1	cpar2_401970	1	no_id
CORT0E02230	complement(join(482380..483458,483732..483957))	1	cpar2_402180	1	orf19.5647
CORT0E02270	join(488833..488942,489363..490758)	1	cpar2_402220	1	orf19.5653
CORT0E02280	join(491028..491045,491105..492484)	1	cpar2_402230	1	orf19.5654
CORT0E02310	complement(join(495238..496535,496618..496660))	1	cpar2_402260	1	orf19.377
CORT0E02490	join(528837..528937,529031..529958)	1	cpar2_402440	1	orf19.4182
CORT0E02810	complement(join(599483..600414,600469..600514))	1	cpar2_402760	1	orf19.5660
CORT0E03340	join(724851..726781,726848..727028)	1	cpar2_403320	1	orf19.4575
CORT0E03500	join(764033..764086,764362..764553)	1	cpar2_403450	1	orf19.3366.1
CORT0E04180	join(931541..931619,931683..931719,931782..931896,932001..932216)	3	cpar2_302050	3	orf19.3123.2
CORT0E04210	join(937051..937378,937434..937618,937729..937737,937802..937846)	3	cpar2_302080	3	orf19.2922
CORT0E04290	complement(join(961138..961688,961748..961760))	1	cpar2_302210	1	orf19.5299
CORT0E04340	join(969779..969784,970180..970884)	1	cpar2_302160	1	orf19.4660
CORT0E05040	join(1131336..1131577,1131641..1132211)	1	cpar2_302900	1	no_id
CORT0E05210	complement(join(1162484..1162937,1163030..1163073))	1	cpar2_303070	1	orf19.1114
CORT0E05740	join(1273813..1274085,1274138..1274464)	1	cpar2_303590	1	orf19.3200
CORT0E05750	join(1274571..1274723,1274774..1275136,1275201..1275236)	2	cpar2_303600	2	orf19.3201
CORT0E05930	complement(join(1314329..1315341,1315396..1315414))	1	cpar2_303770	1	orf19.567
CORT0E06250	join(1407172..1407194,1407253..1408270)	1	cpar2_304060	1	orf19.944
CORT0E06320	complement(join(1417254..1417671,1417727..1417737,1417858..1417860))	2	cpar2_304130	2	orf19.953.1
CORT0F00450	join(58805..60817,60871..60909)	1	cpar2_100350	1	orf19.4239
CORT0F00490	complement(join(65846..66078,66143..66209))	1	cpar2_100390	1	orf19.4225.1
CORT0F00690	join(99532..99559,99620..99897)	1	cpar2_100580	1	orf19.4305.1
CORT0F00750	complement(join(110971..111247,111670..111671))	1	cpar2_100640	1	orf19.3942.1
CORT0F00820	complement(join(124959..129760,129861..129951))	1	cpar2_100700	1	orf19.4257
CORT0F00970	join(160775..160813,160864..161766)	1	cpar2_100900	1	orf19.3930
CORT0F01130	join(195327..195351,195413..195810)	1	cpar2_101040	1	orf19.3972
CORT0F01840	join(378176..378207,378262..379099)	1	cpar2_600780	1	orf19.5628
CORT0F01850	complement(join(379464..379719,379775..379785))	1	cpar2_600790	1	orf19.5629
CORT0F02030	join(425083..425116,425449..425837)	1	cpar2_600980	1	orf19.1212
CORT0F02350	complement(join(489194..489747,489805..489823))	1	cpar2_601350	1	orf19.3462
CORT0F02440	complement(join(506954..508412,508485..508690))	1	cpar2_601440	1	orf19.3477
CORT0F02820	complement(join(578511..578882,579257..579298))	1	cpar2_601830	1	orf19.3504
CORT0F03030	join(634101..634175,634236..635741)	1	cpar2_602060	1	orf19.3405
CORT0F03120	complement(join(649557..651163,651214..651220))	1	cpar2_602140	1	orf19.686
CORT0F03140	complement(join(653126..653550,653863..653869))	1	cpar2_602160	1	orf19.687.1
CORT0F03240	complement(join(673250..674477,674537..675219))	1	cpar2_602260	1	orf19.3419
CORT0F03300	join(684049..684066,684118..685284)	1	cpar2_602320	1	orf19.3402
CORT0F03310	complement(join(685328..685754,685807..685832))	1	cpar2_602330	1	orf19.3396
CORT0F03380	complement(join(695409..696851,696906..696983))	1	cpar2_602400	0	NA
CORT0F03500	join(735114..735128,735512..735967)	1	cpar2_602530	1	orf19.3426
CORT0F03530	join(741422..741467,741533..741972)	1	cpar2_602560	1	orf19.3421.1
CORT0F03550	complement(join(750862..750862,751674..751280))	1	cpar2_602580	1	orf19.3415.1
CORT0F03680	join(780047..780265,780318..780746)	1	cpar2_602700	1	orf19.3449.2
CORT0F03690	join(781084..781326,781374..781793)	1	cpar2_602710	1	orf19.3450.1
CORT0F03820	complement(join(816496..816930,817383..817403))	1	cpar2_602850	1	orf19.4193.1
CORT0F03830	complement(join(817604..817667,817729..817987,818046..818142,818202..818204))	3	cpar2_602860	3	orf19.4193
CORT0F03840	join(818498..818543,818604..820234)	1	cpar2_602870	1	orf19.4192
CORT0F03850	complement(join(820408..820875,820930..820932))	1	cpar2_602880	1	orf19.4192.1
CORT0F04200	complement(join(900663..902476,902528..902564))	1	cpar2_603230	1	orf19.114
CORT0F04540	join(988159..988161,988220..988474)	1	cpar2_603570	1	orf19.1203.1
CORT0G00400	join(57305..57586,57641..58480)	1	cpar2_700280	1	orf19.7208
CORT0G00480	join(76609..76611,76674..76994)	1	cpar2_700360	1	orf19.7215.3
CORT0G00630	join(107229..107254,107594..109670)	1	cpar2_700500	1	orf19.7239
CORT0G00880	join(170195..170225,170535..170914)	1	cpar2_700720	1	orf19.5225.2
CORT0G01180	complement(join(235686..236396,236454..236537))	1	cpar2_701020	1	orf19.5236
CORT0G01520	join(294808..294851,294939..295647)	1	cpar2_701350	1	orf19.7335
CORT0G01600	join(313466..313490,313792..315113)	1	cpar2_701430	1	orf19.7308
CORT0G01930	complement(join(391500..391715,391779..391838))	1	cpar2_701780	1	orf19.596.2
CORT0G01990	join(398384..398386,398912..399157)	1	cpar2_701820	1	orf19.6286.2
CORT0G02310	complement(join(462915..463249,463558..463558))	1	cpar2_702160	1	orf19.6403.1
CORT0G02470	complement(join(500259..500459,500527..500529))	1	cpar2_702290	1	orf19.7048.1
CORT0G02580	join(516669..516695,516781..517017)	1	cpar2_702400	1	orf19.7043.1
CORT0G02590	complement(join(517127..517918,517991..518029))	1	cpar2_702410	1	orf19.7082
CORT0G02730	join(548541..548662,548717..548864)	1	cpar2_702590	1	orf19.6551.1
CORT0G02970	join(601151..601172,601223..601962)	1	cpar2_702860	1	orf19.7157
CORT0G03320	complement(join(670727..671878,671936..671968))	1	cpar2_703160	1	orf19.6517
CORT0G03730	complement(join(765828..767356,767966..768200))	1	cpar2_703550	1	orf19.7144
CORT0G04010	join(824272..824504,824560..824590)	1	cpar2_703850	1	orf19.6696
CORT0G04090	complement(join(842442..842915,842971..843012))	1	cpar2_703930	1	orf19.7195
CORT0G04340	join(904838..904889,905076..905124,905184..905565)	2	cpar2_704160	2	orf19.5137.1
CORT0G04480	join(932529..932583,932637..934522)	1	cpar2_704310	1	orf19.5147
CORT0H00300	join(35113..35159,35505..35895)	1	cpar2_300240	1	orf19.7018
CORT0H00390	complement(join(53351..57517,57629..57652))	1	cpar2_300330	1	orf19.7006
CORT0H00500	join(71426..71950,72121..72546)	1	cpar2_300430	1	orf19.6906
CORT0H00630	complement(join(93701..94313,94372..94418))	1	cpar2_300560	1	orf19.6462
CORT0H00850	join(155408..155451,155514..155757)	1	cpar2_300830	1	orf19.6563.1
CORT0H00880	join(161061..162007,162068..162138,162208..163196)	2	cpar2_300860	2	orf19.7038
CORT0H00990	join(181284..181331,181392..184658)	1	cpar2_300970	1	orf19.6568
CORT0H01650	join(340973..341887,342063..342644)	1	cpar2_805300	1	orf19.6559
CORT0H01730	join(355407..355439,356091..357416)	1	cpar2_805380	1	orf19.7076
CORT0H01840	complement(join(383273..385250,385305..385309))	1	cpar2_805440	1	orf19.6534.2
CORT0H01890	complement(join(392645..393384,393450..393498,393562..393564))	2	cpar2_805610	2	orf19.6582
CORT0H02110	join(450578..450596,450667..452822,452889..453404)	2	cpar2_600670	2	orf19.5569
CORT0H02370	complement(join(523871..524010,524069..524099))	1	cpar2_600420	1	orf19.1075.1
CORT0H02760	join(604539..605345,605399..606064)	1	cpar2_600040	1	orf19.5732

## Sheet: Co info
CoID	Co n. int.	CpID	Cp n. int. (CDS)	CaID	Co - Cp #Int.	dir.	E1_s	E1_e	E2_s	E2_e	E3_s	E3_e	E4_s	E4_e	I1_s	I1_e	I2_s	I2_e	I3_s	I3_e
CORT0D02130	0	cpar2_202080	1	orf19.514	-1	-	this has no intron at all
CORT0A00560	1	cpar2_800470	1	orf19.7509.1	0	-	118447	118385	118085	117852					118384	118086
CORT0A00570	1	cpar2_800480	1	orf19.7509.2	0	-	119169	118953	118887	118865					118952	118888
CORT0A00810	1	cpar2_800730	1	orf19.2614	0	-	182589	182583	182528	181852					182582	182529
CORT0A01330	1	cpar2_801270	1	orf19.3735	0	-	291181	291065	291000	289447					291064	291001
CORT0A01930	1	cpar2_801880	1	orf19.4931.1	0	-	438512	438402	438169	437885					438401	438170
CORT0A02090	1	cpar2_802040	1	orf19.2379	0	-	482769	482720	482655	480897					482719	482656
CORT0A02620	1	cpar2_802570	1	orf19.2863.1	0	-	571126	571020	570967	570514					571019	570968
CORT0A02640	1	cpar2_802590	1	orf19.2864.1	0	-	573133	573085	572769	572369					573084	572770
CORT0A02660	1	cpar2_802610	1	orf19.2423	0	-	577047	576967	576908	575004					576966	576909
CORT0A02730	1	cpar2_802670	1	orf19.171	0	-	596980	595672	594789	594410					595671	594790
CORT0A03030	1	cpar2_803070	1	orf19.2533.1	0	-	651234	651232	651180	650914					651231	651181
CORT0A03310	1	cpar2_803290	1	orf19.2318.1	0	-	716144	716106	716056	715379					716105	716057
CORT0A03420	1	cpar2_803400	1	orf19.6265.1	0	-	738971	738962	738617	738229					738961	738618
CORT0A03450	1	cpar2_803430	1	orf19.6264.3	0	-	741600	741577	741518	741009					741576	741519
CORT0A03960	1	cpar2_803930	1	orf19.4723	0	-	867463	867246	867188	866543					867245	867189
CORT0A04040	1	cpar2_804010	1	orf19.3273	0	-	878317	877637	877582	877406					877636	877583
CORT0A04450	1	cpar2_804440	1	orf19.4730	0	-	952228	952215	952156	951397					952214	952157
CORT0A05790	1	cpar2_206430	1	orf19.3559	0	-	1283591	1283100	1282924	1282469					1283099	1282925
CORT0A06670	1	cpar2_207320	1	orf19.4909.1	0	-	1477188	1477078	1476782	1476465					1477077	1476783
CORT0A07040	1	cpar2_207690	1	orf19.1474	0	-	1563292	1563080	1563022	1559621					1563079	1563023
CORT0A08120	1	cpar2_208850	1	orf19.6198.1	0	-	1807439	1807434	1807370	1807059					1807433	1807371
CORT0A08200	1	cpar2_208930	1	orf19.6220.4	0	-	1829611	1829575	1829203	1828884					1829574	1829204
CORT0A08650	1	cpar2_209380	1	orf19.2309.2	0	-	1914929	1914926	1914757	1913997					1914925	1914758
CORT0A08680	1	cpar2_209410	1	orf19.3572.3	0	-	1923143	1923090	1922706	1922422					1923089	1922707
CORT0A08800	1	cpar2_209530	1	orf19.6891	0	-	1944053	1944003	1943947	1941434					1944002	1943948
CORT0A08870	1	cpar2_209600	1	orf19.4128	0	-	1961355	1961321	1961225	1959983					1961320	1961226
CORT0A09160	1	cpar2_209900	1	orf19.5212	0	-	2029182	2029053	2029003	2028078					2029052	2029004
CORT0A09180	1	cpar2_209920	1	orf19.5210.1	0	-	2031801	2031745	2031307	2031167					2031744	2031308
CORT0A09250	1	cpar2_209990	1	orf19.3534	0	-	2046870	2046840	2046786	2046173					2046839	2046787
CORT0A09550	1	cpar2_210250	1	orf19.1494	0	-	2107782	2107717	2107650	2106508					2107716	2107651
CORT0A09870	1	cpar2_210540	1	orf19.2329.1	0	-	2185026	2185024	2184811	2184401					2185023	2184812
CORT0A10180	1	cpar2_210830	1	orf19.1553	0	-	2230851	2230776	2230716	2229431					2230775	2230717
CORT0A10420	1	cpar2_211070	1	orf19.798	0	-	2277024	2277016	2276899	2276126					2277015	2276900
CORT0A12130	1	cpar2_212830	1	orf19.2018.1	0	-	2669349	2669154	2669095	2668971					2669153	2669096
CORT0A12520	1	cpar2_213210	1	orf19.2070	0	-	2735168	2735135	2735077	2733378					2735134	2735078
CORT0A12730	1	cpar2_213420	1	orf19.2094	0	-	2777194	2777159	2777102	2774184					2777158	2777103
CORT0A13060	1	cpar2_213730	1	orf19.1923	0	-	2842239	2842126	2842052	2840211					2842125	2842053
CORT0A13180	1	cpar2_213770	1	orf19.2012	0	-	2866542	2866520	2866460	2864348					2866519	2866461
CORT0A13390	1	cpar2_214070	1	orf19.1448.1	0	-	2915180	2915159	2915065	2914812					2915158	2915066
CORT0B00460	1	cpar2_500330	1	no_id	0	-	77377	77365	77261	76810					77364	77262
CORT0B00530	1	cpar2_500390	1	orf19.2770.1	0	-	87324	87312	87166	86715					87311	87167
CORT0B01400	1	cpar2_501240	1	orf19.3140.1	0	-	292095	292093	292039	291593					292092	292040
CORT0B01610	1	cpar2_501460	1	orf19.4413	0	-	343569	343567	343416	342970					343566	343417
CORT0B01670	1	cpar2_501520	1	orf19.4406	0	-	356285	356249	356197	355407					356248	356198
CORT0B01860	1	cpar2_501700	1	orf19.4151	0	-	408401	408198	408127	406136					408197	408128
CORT0B02140	1	cpar2_501980	1	orf19.4340.1	0	-	451722	451714	451658	451275					451713	451659
CORT0B02260	1	cpar2_502100	1	orf19.6656	0	-	470818	470650	470321	468916					470649	470322
CORT0B04170	1	cpar2_102900	1	orf19.229	0	-	903747	903709	903649	902495					903708	903650
CORT0B04400	1	cpar2_103170	1	orf19.5854	0	-	950944	950829	950769	950196					950828	950770
CORT0B04410	1	cpar2_103180	1	orf19.913.2	0	-	951922	951866	951813	951412					951865	951814
CORT0B05120	1	cpar2_103920	1	no_id	0	-	1111453	1109936	1109887	1109741					1109935	1109888
CORT0B05320	1	cpar2_104110	1	orf19.3582	0	-	1144980	1144931	1144880	1144232					1144930	1144881
CORT0B05340	1	cpar2_104130	1	orf19.3579	0	-	1147042	1147023	1146960	1146327					1147022	1146961
CORT0B05610	1	cpar2_104370	1	orf19.2232	0	-	1196194	1196192	1195889	1195368					1196191	1195890
CORT0B05960	1	cpar2_104760	1	orf19.5486.1	0	-	1274587	1274583	1274521	1274191					1274582	1274522
CORT0B06540	1	cpar2_105330	1	orf19.5194.1	0	-	1388844	1388808	1388757	1388036					1388807	1388758
CORT0B07050	1	cpar2_105840	1	orf19.6063	0	-	1492557	1492545	1492486	1491105					1492544	1492487
CORT0B07180	1	cpar2_105960	1	orf19.2994.1	0	-	1523231	1523211	1522936	1522529					1523210	1522937
CORT0B07650	1	cpar2_106410	1	orf19.2930	0	-	1609277	1609253	1609194	1607318					1609252	1609195
CORT0B08240	1	cpar2_107040	1	orf19.1058	0	-	1713391	1712967	1712901	1712418					1712966	1712902
CORT0B08780	1	cpar2_107590	1	orf19.410.3	0	-	1819016	1818974	1818917	1818466					1818973	1818918
CORT0B09110	1	cpar2_107920	1	orf19.446.2	0	-	1884329	1884302	1884239	1884001					1884301	1884240
CORT0B09120	1	cpar2_107930	1	orf19.446.1	0	-	1885215	1885176	1885086	1884890					1885175	1885087
CORT0B09200	1	cpar2_108020	1	orf19.57	0	-	1906194	1906075	1906016	1905531					1906074	1906017
CORT0B09430	1	cpar2_108330	1	no_id	0	-	1966693	1966666	1966571	1966330					1966665	1966572
CORT0B09530	1	cpar2_108440	1	orf19.2965.1	0	-	1999936	1999795	1999740	1999691					1999794	1999741
CORT0B09610	1	cpar2_108520	1	orf19.3007.2	0	-	2010219	2010184	2010129	2009533					2010183	2010130
CORT0B09650	1	cpar2_108560	1	orf19.3010.1	0	-	2016375	2016315	2015753	2014525					2016314	2015754
CORT0B09670	1	cpar2_108580	1	orf19.3013	0	-	2024547	2024507	2024353	2023189					2024506	2024354
CORT0B10100	1	cpar2_108990	1	orf19.3055	0	-	2107207	2107134	2107081	2105440					2107133	2107082
CORT0B10240	1	cpar2_109170	1	orf19.3325.3	0	-	2130492	2130469	2130058	2129819					2130468	2130059
CORT0B10460	1	cpar2_109380	1	orf19.3351	0	-	2177942	2177926	2177861	2177252					2177925	2177862
CORT0B10535	1	cpar2_109480	1	orf19.3354	0	-	2197766	2197753	2197549	2197330					2197752	2197550			Again, not in CGOB
CORT0B11110	1	cpar2_110000	1	orf19.6010.1	0	-	2328444	2328392	2328333	2328018					2328391	2328334
CORT0B11390	1	cpar2_110280	1	orf19.3001	0	-	2389361	2389333	2389272	2388705					2389332	2389273
CORT0C00250	1	cpar2_808900	1	orf19.6787	0	-	35739	35723	35643	35247					35722	35644
CORT0C01000	1	cpar2_808150	1	orf19.6718	0	-	207637	207585	207531	206829					207584	207532
CORT0C01270	1	cpar2_807860	1	orf19.6187	0	-	268877	267936	267877	266594					267935	267878
CORT0C01370	1	cpar2_807760	1	orf19.6753	0	-	281504	281489	281435	280831					281488	281436
CORT0C01470	1	cpar2_807660	1	orf19.1647	0	-	301747	301520	301468	300662					301519	301469
CORT0C01610	1	cpar2_807530	1	orf19.1658	0	-	325093	324507	323743	322657					324506	323744
CORT0C01720	1	cpar2_807420	1	orf19.5943.1	0	-	351490	351473	351140	350358					351472	351141
CORT0C01930	1	cpar2_807220	1	orf19.7360	0	-	415170	415138	415078	414779					415137	415079
CORT0C02910	1	cpar2_806230	1	orf19.2173	0	-	643298	643293	643159	642086					643292	643160
CORT0C03000	1	cpar2_806140	1	orf19.5876	0	-	659387	659375	659318	658987					659374	659319
CORT0C03190	1	cpar2_805960	1	orf19.5904	0	-	703441	703440	703115	702539					703439	703116
CORT0C03320	1	cpar2_805830	1	orf19.5869	0	-	738750	738733	738580	737456					738732	738581
CORT0C03610	1	cpar2_404200	1	orf19.7436.1	0	-	827376	827332	827234	826956					827331	827235
CORT0C04300	1	cpar2_404880	1	orf19.1634	0	-	975853	975838	975783	974645					975837	975784
CORT0C04540	1	cpar2_405140	1	orf19.1618	0	-	1024456	1024452	1024390	1022236					1024451	1024391
CORT0C04720	1	cpar2_405310	1	orf19.5996.1	0	-	1078000	1077981	1077719	1077299					1077980	1077720
CORT0C04740	1	cpar2_405330	1	orf19.5982	0	-	1081100	1080989	1080609	1080161					1080988	1080610
CORT0C04760	1	cpar2_405350	1	orf19.5985	0	-	1083263	1083247	1083189	1082625					1083246	1083190
CORT0C04980	1	cpar2_405580	1	orf19.5965	0	-	1147292	1147275	1147209	1144006					1147274	1147210
CORT0C05050	1	cpar2_405650	1	orf19.5954	0	-	1158679	1157782	1157729	1157128					1157781	1157730
CORT0C05090	1	cpar2_405680	1	orf19.6975	0	-	1164313	1164224	1163946	1163251					1164223	1163947
CORT0C06070	1	cpar2_406660	1	orf19.2257	0	-	1371808	1371759	1371701	1370648					1371758	1371702
CORT0C06900	1	cpar2_407550	1	orf19.2179.2	0	-	1549360	1549309	1548928	1548621					1549308	1548929
CORT0D00640	1	cpar2_200560	1	orf19.7600	0	-	79956	79936	79826	78708					79935	79827
CORT0D00870	1	cpar2_200780	1	orf19.7571	0	-	126289	126246	125800	125401					126245	125801
CORT0D01030	1	cpar2_200980	1	orf19.7339	0	-	176417	176210	176155	173643					176209	176156
CORT0D01050	1	cpar2_201000	1	orf19.7341	0	-	180092	180077	180022	179040					180076	180023
CORT0D01120	1	cpar2_201070	1	orf19.2835	0	-	193336	193309	193250	192238					193308	193251
CORT0D01180	1	cpar2_201130	1	orf19.6604	0	-	200922	200917	200862	200065					200916	200863
CORT0D01610	1	cpar2_201560	1	orf19.5006.1	0	-	278121	278041	277972	277724					278040	277973
CORT0D02060	1	cpar2_202020	1	orf19.2621	0	-	374449	374447	374395	373937					374446	374396
CORT0D02730	1	cpar2_202650	1	orf19.4955	0	-	495320	495248	495179	493726					495247	495180
CORT0D02990	1	cpar2_202910	1	orf19.4969	0	-	557142	557139	557085	552692					557138	557086
CORT0D03350	1	cpar2_203260	1	orf19.1848.1	0	-	637425	637423	637363	637151					637422	637364
CORT0D03630	1	cpar2_203520	1	orf19.5024	0	-	693520	693486	692978	691505					693485	692979
CORT0D03790	1	cpar2_203680	1	orf19.1166	0	-	737441	737426	737373	734522					737425	737374
CORT0D03870	1	cpar2_203760	1	orf19.4862.2	0	-	749819	749760	749673	749428					749759	749674
CORT0D04320	1	cpar2_204240	1	orf19.544.1	0	-	840974	840940	840841	840124					840939	840842
CORT0D05830	1	cpar2_205710	1	orf19.6419.1	0	-	1171920	1171829	1171745	1171547					1171828	1171746
CORT0D07070	1	cpar2_503580	1	orf19.1680	0	-	1460242	1460240	1460182	1456742					1460239	1460183
CORT0D07220	1	cpar2_503710	1	orf19.1702	0	-	1483708	1483694	1483639	1483127					1483693	1483640
CORT0D07290	1	cpar2_503820	1	orf19.5394.1	0	-	1504242	1504232	1504173	1503810					1504231	1504174
CORT0D07630	1	cpar2_504170	1	orf19.5466	0	-	1584125	1584123	1583876	1583472					1584122	1583877
CORT0E00380	1	cpar2_400330	1	orf19.2713	0	-	79435	79016	78967	77018					79015	78968
CORT0E00840	1	cpar2_400800	1	orf19.2707.1	0	-	163025	163014	162887	162696					163013	162888
CORT0E01650	1	cpar2_401600	1	orf19.4565	0	-	358148	358086	357924	357061					358085	357925
CORT0E01840	1	cpar2_401800	1	orf19.3788.1	0	-	396180	396178	396027	395710					396177	396028
CORT0E02000	1	cpar2_401960	1	orf19.3838	0	-	431289	431207	430880	430325					431206	430881
CORT0E02010	1	cpar2_401970	1	no_id	0	-	433375	433326	433263	431508					433325	433264
CORT0E02230	1	cpar2_402180	1	orf19.5647	0	-	483957	483732	483458	482380					483731	483459
CORT0E02310	1	cpar2_402260	1	orf19.377	0	-	496660	496618	496535	495238					496617	496536
CORT0E02810	1	cpar2_402760	1	orf19.5660	0	-	600514	600469	600414	599483					600468	600415
CORT0E04290	1	cpar2_302210	1	orf19.5299	0	-	961760	961748	961688	961138					961747	961689
CORT0E05210	1	cpar2_303070	1	orf19.1114	0	-	1163073	1163030	1162937	1162484					1163029	1162938
CORT0E05930	1	cpar2_303770	1	orf19.567	0	-	1315414	1315396	1315341	1314329					1315395	1315342
CORT0F00490	1	cpar2_100390	1	orf19.4225.1	0	-	66209	66143	66078	65846					66142	66079
CORT0F00750	1	cpar2_100640	1	orf19.3942.1	0	-	111671	111670	111247	110971					111669	111248
CORT0F00820	1	cpar2_100700	1	orf19.4257	0	-	129951	129861	129760	124959					129860	129761
CORT0F01850	1	cpar2_600790	1	orf19.5629	0	-	379785	379775	379719	379464					379774	379720
CORT0F02350	1	cpar2_601350	1	orf19.3462	0	-	489823	489805	489747	489194					489804	489748
CORT0F02440	1	cpar2_601440	1	orf19.3477	0	-	508690	508485	508412	506954					508484	508413
CORT0F02820	1	cpar2_601830	1	orf19.3504	0	-	579298	579257	578882	578511					579256	578883
CORT0F03120	1	cpar2_602140	1	orf19.686	0	-	651220	651214	651163	649557					651213	651164
CORT0F03140	1	cpar2_602160	1	orf19.687.1	0	-	653869	653863	653550	653126					653862	653551
CORT0F03240	1	cpar2_602260	1	orf19.3419	0	-	675219	674537	674477	673250					674536	674478
CORT0F03310	1	cpar2_602330	1	orf19.3396	0	-	685832	685807	685754	685328					685806	685755
CORT0F03380	1				0	-	696983	696906	696851	695409					696905	696852			Ortholog of cpar2_602400, no mapped intron	Ken says: CORT gene is ortholog of Cpar2_602400 (=cpar1190) in CGOB, which its shorter at the 5' end. Also hits cpar1224 (I don't know its cpar2 name) in BLAST; cpar1224 matches at the 5' end and has an intron. Need to check that Cpar2_602400 isn't extendable with an intron in Cpar.GB_ cpar1224 is cpar2_602060, which has an extra gene between it and cpar2_60240. Ask Ale G to check for evidence of…
CORT0F03550	1	cpar2_602580	1	orf19.3415.1	0	-	751280	751674	750862	750862					751673	750863
CORT0F03820	1	cpar2_602850	1	orf19.4193.1	0	-	817403	817383	816930	816496					817382	816931
CORT0F03850	1	cpar2_602880	1	orf19.4192.1	0	-	820932	820930	820875	820408					820929	820876
CORT0F04200	1	cpar2_603230	1	orf19.114	0	-	902564	902528	902476	900663					902527	902477
CORT0G01180	1	cpar2_701020	1	orf19.5236	0	-	236537	236454	236396	235686					236453	236397
CORT0G01930	1	cpar2_701780	1	orf19.596.2	0	-	391838	391779	391715	391500					391778	391716
CORT0G02310	1	cpar2_702160	1	orf19.6403.1	0	-	463558	463558	463249	462915					463557	463250
CORT0G02470	1	cpar2_702290	1	orf19.7048.1	0	-	500529	500527	500459	500259					500526	500460
CORT0G02590	1	cpar2_702410	1	orf19.7082	0	-	518029	517991	517918	517127					517990	517919
CORT0G03320	1	cpar2_703160	1	orf19.6517	0	-	671968	671936	671878	670727					671935	671879
CORT0G03730	1	cpar2_703550	1	orf19.7144	0	-	768200	767966	767356	765828					767965	767357
CORT0G04090	1	cpar2_703930	1	orf19.7195	0	-	843012	842971	842915	842442					842970	842916
CORT0H00390	1	cpar2_300330	1	orf19.7006	0	-	57652	57629	57517	53351					57628	57518
CORT0H00630	1	cpar2_300560	1	orf19.6462	0	-	94418	94372	94313	93701					94371	94314
CORT0H01840	1	cpar2_805440	1	orf19.6534.2	0	-	385309	385305	385250	383273					385304	385251
CORT0H02370	1	cpar2_600420	1	orf19.1075.1	0	-	524099	524069	524010	523871					524068	524011
CORT0A08210	2	cpar2_208940	2	orf19.6220.3	0	-	1830789	1830754	1830696	1830636	1830556	1830228			1830753	1830697	1830635	1830557
CORT0A11040	2	cpar2_211700	2	orf19.909.1	0	-	2418989	2418942	2418880	2418729	2418668	2418641			2418941	2418881	2418728	2418669
CORT0B02200	2	cpar2_502040	2	orf19.2639.1	0	-	457844	457833	457775	457550	457490	457354			457832	457776	457549	457491
CORT0B04130	2	cpar2_102860	2	orf19.233.1	0	-	897499	897469	897417	897328	897262	897042			897468	897418	897327	897263
CORT0B06550	2	cpar2_105340	2	orf19.6854	0	-	1391049	1390975	1390736	1390594	1390404	1388979			1390974	1390737	1390593	1390405
CORT0B07090	2	cpar2_105880	2	orf19.6034	0	-	1501036	1501025	1500737	1500702	1500606	1499305			1501024	1500738	1500701	1500607
CORT0E06320	2	cpar2_304130	2	orf19.953.1	0	-	1417860	1417858	1417737	1417727	1417671	1417254			1417857	1417738	1417726	1417672
CORT0H01890	2	cpar2_805610	2	orf19.6582	0	-	393564	393562	393498	393450	393384	392645			393561	393499	393449	393385
CORT0A08190	3	cpar2_208920	3	orf19.6222	0	-	1828698	1828650	1828591	1825975	1825922	1825835	1825778	1825698	1828649	1828592	1825974	1825923	1825834	1825779
CORT0A10640	3	cpar2_211300	3	orf19.836.1	0	-	2323099	2323070	2323004	2322933	2322868	2322794	2322727	2322632	2323069	2323005	2322932	2322869	2322793	2322728
CORT0B11140	3	cpar2_110030	3	orf19.6013	0	-	2338786	2338745	2338689	2338594	2338536	2338131	2338076	2337823	2338744	2338690	2338593	2338537	2338130	2338077
CORT0F03830	3	cpar2_602860	3	orf19.4193	0	-	818204	818202	818142	818046	817987	817729	817667	817604	818201	818143	818045	817988	817728	817668
CORT0H01800	0	cpar2_805480	1	orf19.6539	-1	'+	this was only the second CDS and I did not find the first one; then it became a single exon CDS with no introns
CORT0A00720	1	cpar2_800640	1	orf19.2598	0	+	163747	163767	163827	164486					163768	163826
CORT0A00950	1	cpar2_800880	1	orf19.3251	0	+	209801	209803	209863	210375					209804	209862
CORT0A01520	1	cpar2_801460	1	orf19.2613	0	+	335274	335282	335338	336330					335283	335337
CORT0A02060	1	cpar2_802010	1	orf19.4393	0	+	475116	475202	475327	476640					475203	475326
CORT0A02270	1	cpar2_802220	1	orf19.2397.3	0	+	506640	506874	506937	507658					506875	506936
CORT0A02570	1	cpar2_802520	1	orf19.2416.1	0	+	564681	564683	564762	565190					564684	564761
CORT0A02870	1	cpar2_802830	1	orf19.2546	0	+	628214	628216	628273	629817					628217	628272
CORT0A03150	1	cpar2_803140	1	orf19.3223.1	0	+	675870	675873	675980	676272					675874	675979
CORT0A03160	1	cpar2_803150	1	orf19.3223	0	+	676783	676832	676983	677832					676833	676982
CORT0A03330	1	cpar2_803310	1	orf19.2322.3	0	+	717866	718081	718133	718567					718082	718132
CORT0A03440	1	cpar2_803420	1	orf19.6264.4	0	+	740032	740037	740307	740456					740038	740306
CORT0A03590	1	cpar2_803570	1	orf19.1840	0	+	772452	772493	772553	776557					772494	772552
CORT0A03650	1	cpar2_803630	1	orf19.4826	0	+	788276	788305	788562	789629					788306	788561
CORT0A04510	1	cpar2_804520	1	orf19.1139	0	+	968806	968836	969636	972373					968837	969635
CORT0A04720	1	cpar2_804710	1	orf19.5104	0	+	1023433	1023497	1023559	1024000					1023498	1023558
CORT0A05510	1	cpar2_403980	1	orf19.4879.2	0	+	1212638	1212644	1212710	1213077					1212645	1212709
CORT0A06590	1	cpar2_207230	1	orf19.393	0	+	1457716	1457737	1457788	1458314					1457738	1457787
CORT0A06820	1	cpar2_207470	1	orf19.5249	0	+	1507808	1507865	1507923	1508509					1507866	1507922
CORT0A07240	1	cpar2_207910	1	orf19.667.1	0	+	1612313	1612319	1612666	1612931					1612320	1612665
CORT0A08060	1	cpar2_208780	1	orf19.2782	0	+	1793875	1793919	1793998	1794402					1793920	1793997
CORT0A08620	1	cpar2_209350	1	orf19.2311	0	+	1910712	1910714	1910926	1911696					1910715	1910925
CORT0A08640	1	cpar2_209370	1	orf19.2310	0	+	1912988	1913091	1913166	1913919					1913092	1913165
CORT0A08720	1	cpar2_209450	1	orf19.6882.1	0	+	1929731	1929749	1930063	1930367					1929750	1930062
CORT0A08850	1	cpar2_209580	1	orf19.4127	0	+	1957109	1957155	1957225	1958593					1957156	1957224
CORT0A09840	1	cpar2_210510	1	orf19.4720	0	+	2178733	2178813	2178863	2179252					2178814	2178862
CORT0A09950	1	cpar2_210620	1	orf19.1496	0	+	2195502	2195507	2195579	2197717					2195508	2195578
CORT0A09970	1	cpar2_210640	1	orf19.5817	0	+	2199825	2199878	2199933	2200454					2199879	2199932
CORT0A10480	1	cpar2_211130	1	orf19.792	0	+	2288860	2290630	2292634	2293868					2290631	2292633
CORT0A10530	1	cpar2_211180	1	orf19.837.1	0	+	2302470	2302610	2302677	2302937					2302611	2302676
CORT0A10550	1	cpar2_211200	1	orf19.838.1	0	+	2305175	2305181	2305686	2306257					2305182	2305685
CORT0A10560	1	cpar2_211210	1	orf19.840	0	+	2306684	2306694	2307077	2307548					2306695	2307076
CORT0A10720	1	cpar2_211390	1	orf19.827.1	0	+	2339739	2339751	2340151	2340437					2339752	2340150
CORT0A10820	1	cpar2_211480	1	orf19.873.1	0	+	2374777	2374946	2375004	2375286					2374947	2375003
CORT0A10970	1	cpar2_211630	1	orf19.5788	0	+	2399877	2399880	2400092	2402616					2399881	2400091
CORT0A11310	1	cpar2_211970	1	orf19.1517	0	+	2492462	2492477	2492549	2493609					2492478	2492548
CORT0A11800	1	cpar2_212480	1	orf19.827	0	+	2602713	2603292	2603352	2603410					2603293	2603351
CORT0A11930	1	cpar2_212610	1	orf19.2343.1	0	+	2625738	2625745	2625807	2626017					2625746	2625806
CORT0A11980	1	cpar2_212680	1	orf19.4437	0	+	2639173	2639190	2639248	2642310					2639191	2639247
CORT0A12210	1	cpar2_212910	1	orf19.2031	0	+	2684314	2684361	2684415	2685044					2684362	2684414
CORT0A12480	1	cpar2_213170	1	orf19.2066.1	0	+	2727967	2728030	2728310	2728449					2728031	2728309
CORT0A12640	1	cpar2_213330	1	orf19.2089	0	+	2760967	2760994	2761048	2761844					2760995	2761047
CORT0A12770	1	cpar2_213460	1	orf19.2099	0	+	2785802	2785838	2785898	2788743					2785839	2785897
CORT0A12850	1	cpar2_213520	1	orf19.2107	0	+	2797830	2797902	2797957	2799047					2797903	2797956
CORT0B00650	1	cpar2_500510	1	orf19.1238	0	+	118415	118426	118483	119943					118427	118482
CORT0B01100	1	cpar2_500930	1	orf19.1409.1	0	+	226848	226859	227234	227587					226860	227233
CORT0B01840	1	cpar2_501680	1	orf19.4149.1	0	+	403287	403331	403666	404088					403332	403665
CORT0B01980	1	cpar2_501830	1	orf19.1967	0	+	428940	429021	429086	429528					429022	429085
CORT0B02420	1	cpar2_502240	1	orf19.3211	0	+	501027	501058	501111	502080					501059	501110
CORT0B02620	1	cpar2_502430	1	orf19.3991	0	+	550627	550798	550875	553075					550799	550874
CORT0B02820	1	cpar2_502720	1	orf19.4002	0	+	585761	585781	585845	587215					585782	585844
CORT0B03230	1	cpar2_101930	1	orf19.1730	0	+	690779	690818	690880	691847					690819	690879
CORT0B03435	1	cpar2_102130	1	no_Ca	0	+	744446	744448	744750	744962					744449	744749			This isn't in CGOB. Make sure that Sarah is clearly informed about any genes you want to add (she is away for 2 weeks). Check everything in CGOB.	Alessandro: I'll compare my annotation against a new pillar dump after Sarah comes back
CORT0B03740	1	cpar2_102500	1	orf19.297	0	+	818803	818867	818923	819349					818868	818922
CORT0B03800	1	cpar2_102440	1	orf19.242.2	0	+	827792	827794	827872	828057					827795	827871
CORT0B04100	1	cpar2_102830	1	orf19.238	0	+	893469	893493	893640	894613					893494	893639
CORT0B04120	1	cpar2_102850	1	orf19.234	0	+	895999	896049	896104	896922					896050	896103
CORT0B04160	1	cpar2_102890	1	orf19.227	0	+	901682	901683	901747	901927					901684	901746
CORT0B04620	1	cpar2_103410	1	orf19.337	0	+	1001385	1001478	1001555	1002123					1001479	1001554
CORT0B05000	1	cpar2_103800	1	orf19.2439.1	0	+	1086799	1086807	1086931	1087158					1086808	1086930
CORT0B05300	1	cpar2_104090	1	orf19.6866	0	+	1141947	1141949	1142003	1142902					1141950	1142002
CORT0B05360	1	cpar2_104140	1	orf19.810	0	+	1147801	1147846	1147887	1151236					1147847	1147886
CORT0B05640	1	cpar2_104410	1	orf19.2237.1	0	+	1202576	1202578	1202659	1203204					1202579	1202658
CORT0B05800	1	cpar2_104580	1	orf19.18	0	+	1240858	1241308	1241472	1242586					1241309	1241471
CORT0B05910	1	cpar2_104710	1	orf19.5491.1	0	+	1267134	1267151	1267483	1267797					1267152	1267482
CORT0B06450	1	cpar2_105250	1	orf19.6846	0	+	1368019	1368038	1368094	1369066					1368039	1368093
CORT0B06710	1	cpar2_105490	1	orf19.768	0	+	1417676	1417788	1417855	1420489					1417789	1417854
CORT0B07040	1	cpar2_105830	1	orf19.6062.3	0	+	1490475	1490576	1490677	1491030					1490577	1490676
CORT0B07560	1	cpar2_106320	1	orf19.3690.2	0	+	1585063	1585081	1585167	1585531					1585082	1585166
CORT0B08260	1	cpar2_107060	1	orf19.1055	0	+	1715183	1715192	1715257	1716590					1715193	1715256
CORT0B08390	1	cpar2_107190	1	orf19.1039	0	+	1735656	1735658	1735722	1736822					1735659	1735721
CORT0B08660	1	cpar2_107460	1	orf19.2480.1	0	+	1794924	1794957	1795024	1795397					1794958	1795023
CORT0B08800	1	cpar2_107610	1	orf19.412	0	+	1822305	1822314	1822396	1823906					1822315	1822395
CORT0B09340	1	cpar2_108200	1	orf19.3663.1	0	+	1943563	1943590	1943850	1944091					1943591	1943849
CORT0B09730	1	cpar2_108640	1	orf19.3021	0	+	2033329	2033355	2033405	2034508					2033356	2033404
CORT0B10060	1	cpar2_108950	1	orf19.3061.1	0	+	2101878	2102010	2102260	2102519					2102011	2102259
CORT0B10160	1	cpar2_109060	1	orf19.4545	0	+	2115532	2115573	2115726	2118602					2115574	2115725
CORT0B10600	1	cpar2_109530	1	orf19.6105	0	+	2213037	2213078	2213154	2214245					2213079	2213153
CORT0B11410	1	cpar2_110300	1	orf19.3003	0	+	2391460	2391474	2391611	2395981					2391475	2391610
CORT0B11420	1	cpar2_110310	1	orf19.3003.1	0	+	2396927	2396938	2397210	2397728					2396939	2397209
CORT0B11490	1	cpar2_110380	1	orf19.1032	0	+	2412233	2412244	2412302	2414062					2412245	2412301
CORT0C00240	1	cpar2_808910	1	orf19.6786	0	+	34045	34106	34160	35093					34107	34159
CORT0C00580	1	cpar2_808580	1	orf19.6822	0	+	115428	115430	115495	116364					115431	115494
CORT0C01160	1	cpar2_807990	1	orf19.6747	0	+	245889	245903	245956	246906					245904	245955
CORT0C01230	1	cpar2_807920	1	orf19.6738	0	+	258497	258558	258624	260043					258559	258623
CORT0C01580	1	cpar2_807560	1	orf19.5927	0	+	318825	318837	319127	319542					318838	319126
CORT0C02250	1	cpar2_806920	1	orf19.6998	0	+	480039	480070	480129	480831					480071	480128
CORT0C02260	1	cpar2_806910	1	orf19.356	0	+	481590	481642	481698	482448					481643	481697
CORT0C02350	1	cpar2_806820	1	orf19.7382	0	+	506366	506564	507471	507637					506565	507470
CORT0C03050	1	cpar2_806090	1	orf19.5886	0	+	668370	668383	668599	669067					668384	668598
CORT0C03090	1	cpar2_806050	1	orf19.5893	0	+	678528	678576	678773	679365					678577	678772
CORT0C03230	1	cpar2_805920	1	no_id	0	+	711650	711680	711814	711953					711681	711813
CORT0C03310	1	cpar2_805840	1	orf19.5870	0	+	736401	736415	736495	737364					736416	736494
CORT0C03410	1	cpar2_805740	1	orf19.2167	0	+	761537	761554	761613	762944					761555	761612
CORT0C03430	1	cpar2_805730	1	orf19.2168.3	0	+	763490	763540	763698	764180					763541	763697
CORT0C03460	1	cpar2_805700	1	orf19.1604	0	+	772505	772571	772681	775451					772572	772680
CORT0C03810	1	cpar2_404400	1	orf19.5917.3	0	+	868978	869274	870042	870419					869275	870041
CORT0C04060	1	cpar2_404640	1	orf19.7428	0	+	919590	919603	919663	920749					919604	919662
CORT0C04110	1	cpar2_404680	1	no_id	0	+	932609	932731	932815	933216					932732	932814
CORT0C04460	1	cpar2_405050	1	orf19.1624	0	+	1008551	1008569	1008631	1010963					1008570	1008630
CORT0C04970	1	cpar2_405570	1	orf19.5964.2	0	+	1143118	1143120	1143431	1143790					1143121	1143430
CORT0C05250	1	cpar2_405840	1	orf19.1750	0	+	1216054	1216130	1216880	1217606					1216131	1216879
CORT0C05320	1	cpar2_405920	1	orf19.4090.1	0	+	1229101	1229123	1229190	1229409					1229124	1229189
CORT0C05530	1	cpar2_406130	1	orf19.1400	0	+	1263120	1263245	1263298	1264917					1263246	1263297
CORT0C05690	1	cpar2_406290	1	no_id	0	+	1297260	1297832	1297886	1298581					1297833	1297885
CORT0C07090	1	cpar2_407750	1	orf19.5348	0	+	1594386	1594408	1594460	1596671					1594409	1594459
CORT0C07220	1	cpar2_407880	1	orf19.5342.1	0	+	1613323	1613338	1613389	1613903					1613339	1613388
CORT0D00840	1	cpar2_200750	1	orf19.7576	0	+	115904	115994	116049	116356					115995	116048
CORT0D01320	1	cpar2_201270	1	orf19.7292	0	+	218142	218157	218209	219368					218158	218208
CORT0D01360	1	cpar2_201310	1	orf19.6340	0	+	231045	231119	231170	231739					231120	231169
CORT0D01620	1	cpar2_201570	1	orf19.5007	0	+	279856	279865	280454	281574					279866	280453
CORT0D01750	1	cpar2_201690	1	orf19.6358	0	+	299734	299744	299799	300201					299745	299798
CORT0D01810	1	cpar2_201750	1	orf19.68.2	0	+	306321	306403	306455	306776					306404	306454
CORT0D02370	1	cpar2_202320	1	orf19.485	0	+	427404	427953	428012	428049					427954	428011
CORT0D02420	1	cpar2_202370	1	orf19.479.2	0	+	433642	433675	433747	434366					433676	433746
CORT0D02580	1	cpar2_202510	1	orf19.4378	0	+	468336	468352	468410	469388					468353	468409
CORT0D02630	1	cpar2_202550	1	orf19.4375.1	0	+	477555	477557	477940	478122					477558	477939
CORT0D02710	1	cpar2_202630	1	orf19.4952.1	0	+	491548	491638	491716	492104					491639	491715
CORT0D02980	1	cpar2_202900	1	orf19.4967	0	+	552199	552217	552281	552579					552218	552280
CORT0D03290	1	cpar2_203190	1	orf19.1856	0	+	627976	628012	628084	629105					628013	628083
CORT0D03810	1	cpar2_203700	1	orf19.1162.1	0	+	738449	738479	738528	738883					738480	738527
CORT0D03940	1	cpar2_203830	0	orf19.1738	'+1	+	764416	764469	764537	766000					764470	764536
CORT0D04210	1	cpar2_204110	1	orf19.6313.2	0	+	812573	812591	812645	812952					812592	812644
CORT0D04850	1	cpar2_204740	1	orf19.1860	0	+	950446	950478	950802	952016					950479	950801
CORT0D04920	1	cpar2_204810	1	orf19.703	0	+	961928	961931	961981	962765					961932	961980
CORT0D05980	1	cpar2_205860	1	orf19.6414.3	0	+	1200598	1200615	1200859	1201326					1200616	1200858
CORT0E00360	1	cpar2_400350	1	orf19.2711.1	0	+	73807	73817	73884	74580					73818	73883
CORT0E00970	1	cpar2_400930	2	orf19.4647	-1	+	195044	195140	195197	195999					195141	195196
CORT0E01890	1	cpar2_401850	1	orf19.2509	0	+	406812	407383	407434	408679					407384	407433
CORT0E02270	1	cpar2_402220	1	orf19.5653	0	+	488833	488942	489363	490758					488943	489362
CORT0E02280	1	cpar2_402230	1	orf19.5654	0	+	491028	491045	491105	492484					491046	491104
CORT0E02490	1	cpar2_402440	1	orf19.4182	0	+	528837	528937	529031	529958					528938	529030
CORT0E03340	1	cpar2_403320	1	orf19.4575	0	+	724851	726781	726848	727028					726782	726847
CORT0E03500	1	cpar2_403450	1	orf19.3366.1	0	+	764033	764086	764362	764553					764087	764361
CORT0E04340	1	cpar2_302160	1	orf19.4660	0	+	969779	969784	970180	970884					969785	970179
CORT0E05040	1	cpar2_302900	1	no_id	0	+	1131336	1131577	1131641	1132211					1131578	1131640
CORT0E05740	1	cpar2_303590	1	orf19.3200	0	+	1273813	1274085	1274138	1274464					1274086	1274137
CORT0E06250	1	cpar2_304060	1	orf19.944	0	+	1407172	1407194	1407253	1408270					1407195	1407252
CORT0F00450	1	cpar2_100350	1	orf19.4239	0	+	58805	60817	60871	60909					60818	60870
CORT0F00690	1	cpar2_100580	1	orf19.4305.1	0	+	99532	99559	99620	99897					99560	99619
CORT0F00970	1	cpar2_100900	1	orf19.3930	0	+	160775	160813	160864	161766					160814	160863
CORT0F01130	1	cpar2_101040	1	orf19.3972	0	+	195327	195351	195413	195810					195352	195412
CORT0F01840	1	cpar2_600780	1	orf19.5628	0	+	378176	378207	378262	379099					378208	378261
CORT0F02030	1	cpar2_600980	1	orf19.1212	0	+	425083	425116	425449	425837					425117	425448
CORT0F03030	1	cpar2_602060	1	orf19.3405	0	+	634101	634175	634236	635741					634176	634235
CORT0F03300	1	cpar2_602320	1	orf19.3402	0	+	684049	684066	684118	685284					684067	684117
CORT0F03500	1	cpar2_602530	1	orf19.3426	0	+	735114	735128	735512	735967					735129	735511
CORT0F03530	1	cpar2_602560	1	orf19.3421.1	0	+	741422	741467	741533	741972					741468	741532
CORT0F03680	1	cpar2_602700	1	orf19.3449.2	0	+	780047	780265	780318	780746					780266	780317
CORT0F03690	1	cpar2_602710	1	orf19.3450.1	0	+	781084	781326	781374	781793					781327	781373
CORT0F03840	1	cpar2_602870	1	orf19.4192	0	+	818498	818543	818604	820234					818544	818603
CORT0F04540	1	cpar2_603570	1	orf19.1203.1	0	+	988159	988161	988220	988474					988162	988219
CORT0G00400	1	cpar2_700280	1	orf19.7208	0	+	57305	57586	57641	58480					57587	57640
CORT0G00480	1	cpar2_700360	1	orf19.7215.3	0	+	76609	76611	76674	76994					76612	76673
CORT0G00630	1	cpar2_700500	1	orf19.7239	0	+	107229	107254	107594	109670					107255	107593
CORT0G00880	1	cpar2_700720	1	orf19.5225.2	0	+	170195	170225	170535	170914					170226	170534
CORT0G01520	1	cpar2_701350	1	orf19.7335	0	+	294808	294851	294939	295647					294852	294938
CORT0G01600	1	cpar2_701430	1	orf19.7308	0	+	313466	313490	313792	315113					313491	313791
CORT0G01990	1	cpar2_701820	1	orf19.6286.2	0	+	398384	398386	398912	399157					398387	398911
CORT0G02580	1	cpar2_702400	1	orf19.7043.1	0	+	516669	516695	516781	517017					516696	516780
CORT0G02730	1	cpar2_702590	1	orf19.6551.1	0	+	548541	548662	548717	548864					548663	548716
CORT0G02970	1	cpar2_702860	1	orf19.7157	0	+	601151	601172	601223	601962					601173	601222
CORT0G04010	1	cpar2_703850	1	orf19.6696	0	+	824272	824504	824560	824590					824505	824559
CORT0G04480	1	cpar2_704310	1	orf19.5147	0	+	932529	932583	932637	934522					932584	932636
CORT0H00300	1	cpar2_300240	1	orf19.7018	0	+	35113	35159	35505	35895					35160	35504
CORT0H00500	1	cpar2_300430	1	orf19.6906	0	+	71426	71950	72121	72546					71951	72120
CORT0H00850	1	cpar2_300830	1	orf19.6563.1	0	+	155408	155451	155514	155757					155452	155513
CORT0H00990	1	cpar2_300970	1	orf19.6568	0	+	181284	181331	181392	184658					181332	181391
CORT0H01650	1	cpar2_805300	1	orf19.6559	0	+	340973	341887	342063	342644					341888	342062
CORT0H01730	1	cpar2_805380	1	orf19.7076	0	+	355407	355439	356091	357416					355440	356090
CORT0H02760	1	cpar2_600040	1	orf19.5732	0	+	604539	605345	605399	606064					605346	605398
CORT0A02250	2	cpar2_802200	2	orf19.2393	0	+	503334	503935	503986	504023	504105	504823			503936	503985	504024	504104
CORT0A05700	2	cpar2_206350	2	no_id	0	+	1259041	1259057	1259116	1259144	1259207	1259916			1259058	1259115	1259145	1259206
CORT0A12410	2	cpar2_213100	2	orf19.2051	0	+	2710746	2710766	2710874	2710910	2710966	2713814			2710767	2710873	2710911	2710965
CORT0B08670	2	cpar2_107470	2	orf19.2478.1	0	+	1796227	1796234	1796626	1796737	1796929	1797555			1796235	1796625	1796738	1796928
CORT0C04500	2	cpar2_405090	2	orf19.1630	0	+	1013673	1013676	1013759	1013803	1013861	1016220			1013677	1013758	1013804	1013860
CORT0D01930	2	cpar2_201870	2	orf19.3760	0	+	333764	333868	333921	334016	334069	334842			333869	333920	334017	334068
CORT0E05750	2	cpar2_303600	2	orf19.3201	0	+	1274571	1274723	1274774	1275136	1275201	1275236			1274724	1274773	1275137	1275200
CORT0G04340	2	cpar2_704160	2	orf19.5137.1	0	+	904838	904889	905076	905124	905184	905565			904890	905075	905125	905183
CORT0H00880	2	cpar2_300860	2	orf19.7038	0	+	161061	162007	162068	162138	162208	163196			162008	162067	162139	162207
CORT0H02110	2	cpar2_600670	2	orf19.5569	0	+	450578	450596	450667	452822	452889	453404			450597	450666	452823	452888
CORT0B11120	3	cpar2_110010	3	orf19.6011	0	+	2329227	2329285	2329342	2329388	2329446	2329573	2329631	2333683	2329286	2329341	2329389	2329445	2329574	2329630
CORT0E04180	3	cpar2_302050	3	orf19.3123.2	0	+	931541	931619	931683	931719	931782	931896	932001	932216	931620	931682	931720	931781	931897	932000
CORT0E04210	3	cpar2_302080	3	orf19.2922	0	+	937051	937378	937434	937618	937729	937737	937802	937846	937379	937433	937619	937728	937738	937801
Orf missing, gap	gap	cpar2_106690	1	orf19.2942	0	NA
Orf missing, gap	gap	cpar2_109480	1	orf19.3354	0	NA
Orf missing, gap	gap	cpar2_106700	1	no_id	0	NA
Orf missing, gap	gap	cpar2_200520	1	no_id	0	NA
CORT0C02750	incomplete	cpar2_806400	1	no_id	NA
CORT0G00500	incomplete	cpar2_700380	1	orf19.4980	NA
							TO DO: Use standard nomenclature, like join(58476..60473,60555..60581) or complement(join(65459..65694,65758..65824)). You need only one column, because you don't have any 5' introns.

## Sheet: Cp AF4
cpar2_601470	2	orf19.3481		361407..361626, 361205..361360	2	3'UTR_intron	RNA-seq
cpar2_102000	1	orf19.255		complement(456770..457749)	1	5'UTR_intron	RNA-seq
cpar2_105310	1	orf19.5196		complement(1155587..1155650)	1	5'UTR_intron	RNA-seq
cpar2_106400	1	orf19.2929		complement(1378191..1379506)	1	5'UTR_intron	C. albicans
cpar2_106440	1	orf19.2935		1386112..1386368	1	5'UTR_intron	C. albicans
cpar2_108590	1	orf19.3014		complement(1813516..1813652)	1	5'UTR_intron	RNA-seq
cpar2_109870	1	no_id		2098706..2098767	1	5'UTR_intron	RNA-seq
cpar2_200360	1	orf19.7626		complement(58431..58495)	1	5'UTR_intron	RNA-seq
cpar2_203160	1	orf19.2360		627437..627871	1	5'UTR_intron	C. albicans
cpar2_203550	1	orf19.5282		719794..720682	1	5'UTR_intron	C. albicans
cpar2_205060	1	orf19.3856		complement(1026853..1026950)	1	5'UTR_intron	C. albicans
cpar2_205880	1	orf19.6415.1		complement(1220283..1220659)	1	5'UTR_intron	RNA-seq
cpar2_207460	1	orf19.4740		1591337..1591391	1	5'UTR_intron	RNA-seq
cpar2_207710	1	orf19.1471		complement(1652091..1652346)	1	5'UTR_intron	RNA-seq
cpar2_207720	1	orf19.1470		1653220..1653610	1	5'UTR_intron	RNA-seq
cpar2_209360	1	orf19.2310.1		2005414..2005595	1	5'UTR_intron	RNA-seq
cpar2_209730	1	orf19.6873		complement(2079079..2079324)	1	5'UTR_intron	RNA-seq
cpar2_301420	1	orf19.7025		325672..325916	1	5'UTR_intron	RNA-seq
cpar2_304310	1	orf19.6663		1024136..1024285	1	5'UTR_intron	RNA-seq
cpar2_400150	1	orf19.2735		complement(48930..49136)	1	5'UTR_intron	RNA-seq
cpar2_400980	1	orf19.4632		207443..207638	1	5'UTR_intron	RNA-seq
cpar2_401810	1	orf19.3789		394906..395200	1	5'UTR_intron	RNA-seq
cpar2_402610	1	orf19.4623.3		566170..567069	1	5'UTR_intron	RNA-seq
cpar2_406870	1	orf19.2245		1541009..1541071	1	5'UTR_intron	RNA-seq
cpar2_407160	1	orf19.1757		1593568..1594129	1	5'UTR_intron	RNA-seq
cpar2_500870	1	orf19.740		complement(205055..205324)	1	5'UTR_intron	RNA-seq
cpar2_501030	1	orf19.2876		243394..243565	1	5'UTR_intron	RNA-seq
cpar2_502100	1	orf19.6656		complement(474381..474651)	1	5'UTR_intron	RNA-seq
cpar2_603090	1	orf19.3642		complement(729251..730624)	1	5'UTR_intron	RNA-seq
cpar2_701810	1	orf19.6285		380083..380566	1	5'UTR_intron	C. albicans
cpar2_702160	1	orf19.6403.1		complement(459345..459658)	1	5'UTR_intron	RNA-seq
cpar2_804060	1	orf19.7466		complement(913389..913682)	1	5'UTR_intron	C. albicans
cpar2_107460	2	orf19.2480.1	join(1579959..1579992,1580063..1580436)	1579737..1579945	2	5'UTR_intron and corrected ORF	RNA-seq
cpar2_108950	2	orf19.3061.1	join(1888097..1888229,1888485..1888744)	1887730..1888095	2	5'UTR_intron and new_intron	RNA-seq
Cpar2ID	number of introns	C.albicans orthologue	CDS coordinates	UTR Intron coordinates	number of introns	Annotation	Identification
cpar2_100350	contig005569	orf19.4239	join(58476..60473,60555..60581)		1	corrected ORF	C. albicans
cpar2_100390	contig005569	orf19.4225.1	complement(join(65459..65694,65758..65824))		1	corrected ORF	RNA-seq
cpar2_100700	contig005569	orf19.4257	complement(join(124709..129519,129631..129721))		1	corrected ORF	RNA-seq
cpar2_100900	contig005569	orf19.3930	complement(join(164938..165840,165893..165931))		1	corrected ORF	RNA-seq
cpar2_101930	contig005569	orf19.1730	join(434594..434633,434698..435605)		1	corrected ORF	RNA-seq
cpar2_102500	contig005569	orf19.297	complement(join(572349..572775,572836..572900))		1	corrected ORF	RNA-seq
cpar2_102830	contig005569	orf19.238	join(652647..652671,652827..653800)		1	corrected ORF	RNA-seq
cpar2_102850	contig005569	orf19.234	join(655189..655239,655299..656129)		1	corrected ORF	RNA-seq
cpar2_102900	contig005569	orf19.229	complement(join(661684..662913,662985..663023))		1	corrected ORF	RNA-seq
cpar2_103170	contig005569	orf19.5854	complement(join(713685..714288,714354..714469))		1	corrected ORF	RNA-seq
cpar2_103180	contig005569	orf19.913.2	complement(join(715014..715391,715463..715519))		1	corrected ORF	RNA-seq
cpar2_103410	contig005569	orf19.337	join(772429..772522,772606..773180)		1	corrected ORF	RNA-seq
cpar2_103800	contig005569	orf19.2439.1	join(853967..853975,854093..854320)		1	corrected ORF	RNA-seq
cpar2_103920	contig005569	no_id	complement(join(877071..877217,877274..878803))		1	corrected ORF	RNA-seq
cpar2_104090	contig005569	orf19.6866	join(910176..910178,910234..911139)		1	corrected ORF	RNA-seq
cpar2_104110	contig005569	orf19.3582	complement(join(912498..913146,913195..913244))		1	corrected ORF	C. albicans
cpar2_104130	contig005569	orf19.3579	complement(join(914607..915240,915306..915325))		1	corrected ORF	RNA-seq
cpar2_104140	contig005569	orf19.810	join(916130..916184,916234..919559)		1	corrected ORF	C. albicans
cpar2_104370	contig005569	orf19.2232	complement(join(965258..965779,966009..966011))		1	corrected ORF	RNA-seq
cpar2_104410	contig005569	orf19.2237.1	join(972657..972659,972746..973291)		1	corrected ORF	RNA-seq
cpar2_104580	contig005569	orf19.18	join(1009666..1010116,1010302..1011416)		1	corrected ORF	RNA-seq
cpar2_104710	contig005569	orf19.5491.1	join(1038037..1038054,1038353..1038667)		1	corrected ORF	RNA-seq
cpar2_104760	contig005569	orf19.5486.1	complement(join(1045063..1045393,1045459..1045463))		1	corrected ORF	RNA-seq
cpar2_105250	contig005569	orf19.6846	join(1139931..1139950,1140007..1141018)		1	corrected ORF	RNA-seq
cpar2_105330	contig005569	orf19.5194.1	complement(join(1156861..1157582,1157636..1157672))		1	corrected ORF	RNA-seq
cpar2_105340	contig005569	orf19.6854	complement(join(1157842..1159267,1159500..1159642,1159878..1159952))		2	corrected ORF	RNA-seq
cpar2_105490	contig005569	orf19.768	join(1187339..1187451,1187521..1190164)		1	corrected ORF	RNA-seq
cpar2_105840	contig005569	orf19.6063	complement(join(1269905..1271286,1271352..1271364))		1	corrected ORF	RNA-seq
cpar2_105880	contig005569	orf19.6034	complement(join(1278249..1279550,1279654..1279689,1279991..1280002))		2	corrected ORF	RNA-seq
cpar2_105960	contig005569	orf19.2994.1	complement(join(1299461..1299868,1300156..1300176))		1	corrected ORF	RNA-seq
cpar2_106320	contig005569	orf19.3690.2	join(1358725..1358743,1358818..1359182)		1	corrected ORF	RNA-seq
cpar2_106410	contig005569	orf19.2930	complement(join(1381623..1383457,1383519..1383543))		1	corrected ORF	RNA-seq			cpar2_109480	orf19.3354
cpar2_106690	contig005569	orf19.2942	complement(join(1433916..1435458,1435952..1436196))		1	corrected ORF	RNA-seq
cpar2_106700	contig005569	no_id	join(1439727..1439959,1440065..1441607)		1	corrected ORF	RNA-seq
cpar2_107060	contig005569	orf19.1055	join(1499659..1499668,1499738..1501065)		1	corrected ORF	RNA-seq
cpar2_107190	contig005569	orf19.1039	join(1520782..1520784,1520847..1521932)		1	corrected ORF	RNA-seq
cpar2_107470	contig005569	orf19.2478.1	join(1581201..1581208,1581616..1581727,1581948..1582574)		2	corrected ORF	RNA-seq
cpar2_107590	contig005569	orf19.410.3	complement(join(1603413..1603864,1603938..1603980))		1	corrected ORF	RNA-seq
cpar2_107610	contig005569	orf19.412	join(1607670..1607679,1607786..1609311)		1	corrected ORF	RNA-seq
cpar2_108020	contig005569	orf19.57	complement(join(1691993..1692478,1692532..1692651))		1	corrected ORF	RNA-seq
cpar2_108520	contig005569	orf19.3007.2	complement(join(1796714..1797355,1797423..1797458))		1	corrected ORF	C. albicans
cpar2_108560	contig005569	orf19.3010.1	complement(join(1801686..1802926,1803304..1803364))		1	corrected ORF	RNA-seq
cpar2_108580	contig005569	orf19.3013	complement(join(1810774..1811941,1812113..1812153))		1	corrected ORF	RNA-seq
cpar2_108640	contig005569	orf19.3021	join(1821014..1821040,1821092..1822195)		1	corrected ORF	C. albicans
cpar2_108990	contig005569	orf19.3055	complement(join(1891710..1893354,1893413..1893486))		1	corrected ORF	RNA-seq
cpar2_109060	contig005569	orf19.4545	join(1904197..1904238,1904419..1907442)		1	corrected ORF	RNA-seq
cpar2_109170	contig005569	orf19.3325.3	complement(join(1927624..1927863,1928251..1928274))		1	corrected ORF	RNA-seq
cpar2_109380	contig005569	orf19.3351	complement(join(1976190..1976784,1976842..1976858))		1	corrected ORF	RNA-seq
cpar2_109480	contig005569	orf19.3354	complement(join(1996717..1997497,1997722..1997735))		1	corrected ORF	RNA-seq
cpar2_109530	contig005569	orf19.6105	join(2007656..2007697,2007770..2008876)		1	corrected ORF	RNA-seq
cpar2_110000	contig005569	orf19.6010.1	complement(join(2123490..2123805,2123865..2123917))		1	corrected ORF	RNA-seq
cpar2_110010	contig005569	orf19.6011	join(2124724..2124782,2124839..2124885,2124940..2125067,2125130..2129179)		3	corrected ORF	RNA-seq
cpar2_110030	contig005569	orf19.6013	complement(join(2133323..2133642,2133698..2134103,2134162..2134257,2134319..2134360))		3	corrected ORF	RNA-seq
cpar2_110280	contig005569	orf19.3001	complement(join(2185044..2185611,2185668..2185702))		1	corrected ORF	RNA-seq
cpar2_110300	contig005569	orf19.3003	join(2187708..2187722,2187861..2192237)		1	corrected ORF	RNA-seq
cpar2_110310	contig005569	orf19.3003.1	join(2193116..2193127,2193410..2193928)		1	corrected ORF	RNA-seq
cpar2_110380	contig005569	orf19.1032	join(2208680..2208691,2208749..2210584)		1	corrected ORF	RNA-seq
cpar2_200560	contig005809	orf19.7600	complement(join(84118..85236,85359..85379))		1	corrected ORF	RNA-seq
cpar2_200750	contig005809	orf19.7576	join(121542..121632,121695..122002)		1	corrected ORF	RNA-seq
cpar2_200780	contig005809	orf19.7571	complement(join(131040..131439,131907..131950))		1	corrected ORF	RNA-seq
cpar2_200980	contig005809	orf19.7339	complement(join(183081..185593,185643..185850))		1	corrected ORF	C. albicans
cpar2_201000	contig005809	orf19.7341	complement(join(188436..189415,189469..189484))		1	corrected ORF	RNA-seq
cpar2_201070	contig005809	orf19.2835	complement(join(201539..202551,202606..202633))		1	corrected ORF	RNA-seq
cpar2_201130	contig005809	orf19.6604	complement(join(209359..210162,210217..210222))		1	corrected ORF	RNA-seq
cpar2_201270	contig005809	orf19.7292	join(228387..228402,228457..229616)		1	corrected ORF	RNA-seq
cpar2_201310	contig005809	orf19.6340	join(240930..241004,241057..241626)		1	corrected ORF	RNA-seq
cpar2_201560	contig005809	orf19.5006.1	complement(join(288702..288950,289013..289093))		1	corrected ORF	RNA-seq
cpar2_201570	contig005809	orf19.5007	join(290916..290925,291524..292644)		1	corrected ORF	RNA-seq
cpar2_201690	contig005809	orf19.6358	join(309087..309097,309155..309557)		1	corrected ORF	RNA-seq
cpar2_201750	contig005809	orf19.68.2	join(315685..315767,315820..316141)		1	corrected ORF	RNA-seq
cpar2_201870	contig005809	orf19.3760	join(343882..343986,344041..344136,344189..344962)		2	corrected ORF	C. albicans
cpar2_202020	contig005809	orf19.2621	complement(join(385315..385782,385838..385840))		1	corrected ORF	RNA-seq
cpar2_202080	contig005809	orf19.514	complement(join(391211..391236,391290..391554))		1	corrected ORF	RNA-seq
cpar2_202320	contig005809	orf19.485	join(436560..437127,437197..437234)		1	corrected ORF	RNA-seq
cpar2_202510	contig005809	orf19.4378	join(478218..478234,478310..479291)		1	corrected ORF	RNA-seq
cpar2_202630	contig005809	orf19.4952.1	join(502092..502182,502252..502646)		1	corrected ORF	C. albicans
cpar2_202650	contig005809	orf19.4955	complement(join(504189..505708,505777..505849))		1	corrected ORF	C. albicans
cpar2_202900	contig005809	orf19.4967	join(562223..562241,562304..562602)		1	corrected ORF	RNA-seq
cpar2_202910	contig005809	orf19.4969	complement(join(562730..567171,567228..567231))		1	corrected ORF	RNA-seq
cpar2_203190	contig005809	orf19.1856	join(637525..637561,637631..638676)		1	corrected ORF	C. albicans
cpar2_203520	contig005809	orf19.5024	complement(join(703004..704477,705007..705041))		1	corrected ORF	RNA-seq
cpar2_203680	contig005809	orf19.1166	complement(join(748029..750793,750850..750865))		1	corrected ORF	RNA-seq
cpar2_203700	contig005809	orf19.1162.1	join(751871..751901,751955..752313)		1	corrected ORF	C. albicans
cpar2_203760	contig005809	orf19.4862.2	complement(join(764310..764555,764642..764701))		1	corrected ORF	RNA-seq
cpar2_204240	contig005809	orf19.544.1	complement(join(856637..857354,857445..857479))		1	corrected ORF	RNA-seq
cpar2_204740	contig005809	orf19.1860	join(962628..962660,963016..964230)		1	corrected ORF	RNA-seq
cpar2_204810	contig005809	orf19.703	join(974139..974142,974201..974985)		1	corrected ORF	RNA-seq
cpar2_205710	contig005809	orf19.6419.1	complement(join(1188259..1188457,1188551..1188642))		1	corrected ORF	RNA-seq
cpar2_205860	contig005809	orf19.6414.3	join(1216417..1216434,1216728..1217195)		1	corrected ORF	RNA-seq
cpar2_206350	contig005809	no_id	join(1347044..1347060,1347119..1347147,1347211..1347902)		2	corrected ORF	RNA-seq
cpar2_206430	contig005809	orf19.3559	complement(join(1366768..1367223,1367427..1367918))		1	corrected ORF	RNA-seq
cpar2_207230	contig005809	orf19.393	join(1536791..1536812,1536873..1537408)		1	corrected ORF	RNA-seq
cpar2_207320	contig005809	orf19.4909.1	complement(join(1559666..1559982,1560283..1560391))		1	corrected ORF	RNA-seq
cpar2_207470	contig005809	orf19.5249	join(1592430..1592487,1592552..1593138)		1	corrected ORF	RNA-seq
cpar2_207690	contig005809	orf19.1474	complement(join(1645872..1649381,1649449..1649661))		1	corrected ORF	RNA-seq
cpar2_207910	contig005809	orf19.667.1	join(1698400..1698406,1698705..1698970)		1	corrected ORF	RNA-seq
cpar2_208780	contig005809	orf19.2782	join(1882800..1882844,1882909..1883313)		1	corrected ORF	RNA-seq
cpar2_208850	contig005809	orf19.6198.1	complement(join(1895270..1895575,1895635..1895640))		1	corrected ORF	RNA-seq
cpar2_208920	contig005809	orf19.6222	complement(join(1914189..1914211,1914290..1914378,1914458..1917062,1917119..1917167))		3	corrected ORF	C. albicans
cpar2_208930	contig005809	orf19.6220.4	complement(join(1917331..1917650,1917973..1918009))		1	corrected ORF	C. albicans
cpar2_208940	contig005809	orf19.6220.3	complement(join(1918533..1918861,1918941..1919001,1919071..1919106))		2	corrected ORF	RNA-seq
cpar2_209350	contig005809	orf19.2311	join(2004049..2004051,2004281..2005051)		1	corrected ORF	RNA-seq
cpar2_209370	contig005809	orf19.2310	join(2006359..2006462,2006540..2007317)		1	corrected ORF	C. albicans
cpar2_209380	contig005809	orf19.2309.2	complement(join(2007401..2008161,2008334..2008337))		1	corrected ORF	C. albicans
cpar2_209410	contig005809	orf19.3572.3	complement(join(2015752..2016036,2016413..2016466))		1	corrected ORF	RNA-seq
cpar2_209450	contig005809	orf19.6882.1	join(2022509..2022527,2022855..2023159)		1	corrected ORF	RNA-seq
cpar2_209530	contig005809	orf19.6891	complement(join(2034468..2036969,2037028..2037078))		1	corrected ORF	RNA-seq
cpar2_209580	contig005809	orf19.4127	join(2050185..2050231,2050323..2051712)		1	corrected ORF	RNA-seq
cpar2_209600	contig005809	orf19.4128	complement(join(2053103..2054345,2054448..2054482))		1	corrected ORF	RNA-seq
cpar2_209900	contig005809	orf19.5212	complement(join(2123920..2124872,2124929..2125058))		1	corrected ORF	C. albicans
cpar2_209990	contig005809	orf19.3534	complement(join(2141647..2142260,2142331..2142361))		1	corrected ORF	RNA-seq
cpar2_210250	contig005809	orf19.1494	complement(join(2191963..2193096,2193158..2193223))		1	corrected ORF	RNA-seq
cpar2_210510	contig005809	orf19.4720	join(2261141..2261224,2261291..2261680)		1	corrected ORF	RNA-seq
cpar2_210540	contig005809	orf19.2329.1	complement(join(2266537..2266947,2267184..2267186))		1	corrected ORF	RNA-seq
cpar2_210620	contig005809	orf19.1496	join(2278027..2278032,2278113..2280245)		1	corrected ORF	RNA-seq
cpar2_210640	contig005809	orf19.5817	join(2282328..2282381,2282436..2282957)		1	corrected ORF	RNA-seq
cpar2_210830	contig005809	orf19.1553	complement(join(2307830..2309124,2309180..2309255))		1	corrected ORF	RNA-seq
cpar2_211070	contig005809	orf19.798	complement(join(2354746..2355513,2355643..2355651))		1	corrected ORF	RNA-seq
cpar2_211130	contig005809	orf19.792	join(2368631..2370476,2372635..2373869)		1	corrected ORF	RNA-seq
cpar2_211180	contig005809	orf19.837.1	join(2381957..2382097,2382161..2382421)		1	corrected ORF	RNA-seq
cpar2_211200	contig005809	orf19.838.1	join(2384640..2384646,2385159..2385730)		1	corrected ORF	RNA-seq
cpar2_211210	contig005809	orf19.840	join(2386139..2386149,2386523..2386994)		1	corrected ORF	RNA-seq
cpar2_211390	contig005809	orf19.827.1	join(2424846..2424858,2425214..2425500)		1	corrected ORF	RNA-seq
cpar2_211480	contig005809	orf19.873.1	join(2459401..2459570,2459630..2459912)		1	corrected ORF	RNA-seq
cpar2_211630	contig005809	orf19.5788	join(2484803..2484806,2485022..2487546)		1	corrected ORF	RNA-seq
cpar2_211700	contig005809	orf19.909.1	complement(join(2503442..2503469,2503527..2503678,2503737..2503784))		2	corrected ORF	RNA-seq
cpar2_211970	contig005809	orf19.1517	join(2579300..2579315,2579387..2580447)		1	corrected ORF	RNA-seq
cpar2_212480	contig005809	orf19.827	join(2689989..2690583,2690639..2690697)		1	corrected ORF	RNA-seq
cpar2_212610	contig005809	orf19.2343.1	join(2713501..2713508,2713573..2713783)		1	corrected ORF	C. albicans
cpar2_212680	contig005809	orf19.4437	join(2726797..2726814,2726873..2729923)		1	corrected ORF	RNA-seq
cpar2_212830	contig005809	orf19.2018.1	complement(join(2755286..2755410,2755474..2755669))		1	corrected ORF	RNA-seq
cpar2_212910	contig005809	orf19.2031	join(2772095..2772142,2772200..2772829)		1	corrected ORF	RNA-seq
cpar2_213100	contig005809	orf19.2051	join(2797759..2797779,2797874..2797910,2797965..2800840)		2	corrected ORF	RNA-seq
cpar2_213210	contig005809	orf19.2070	complement(join(2820348..2822050,2822119..2822152))		1	corrected ORF	RNA-seq
cpar2_213330	contig005809	orf19.2089	join(2848129..2848156,2848212..2849008)		1	corrected ORF	RNA-seq
cpar2_213420	contig005809	orf19.2094	complement(join(2862968..2865886,2865945..2865980))		1	corrected ORF	RNA-seq
cpar2_213460	contig005809	orf19.2099	join(2874581..2874617,2874679..2877515)		1	corrected ORF	RNA-seq
cpar2_213520	contig005809	orf19.2107	join(2884266..2884338,2884413..2885554)		1	corrected ORF	RNA-seq
cpar2_213730	contig005809	orf19.1923	complement(join(2926305..2928179,2928262..2928372))		1	corrected ORF	RNA-seq
cpar2_213770	contig005809	orf19.2012	join(2935929..2935951,2936013..2938188)		1	corrected ORF	RNA-seq
cpar2_300240	contig005806	orf19.7018	join(47034..47080,47393..47783)		1	corrected ORF	RNA-seq
cpar2_300330	contig005806	orf19.7006	complement(join(64885..69375,69529..69552))		1	corrected ORF	RNA-seq
cpar2_300430	contig005806	orf19.6906	join(83675..84199,84377..84802)		1	corrected ORF	C. albicans
cpar2_300560	contig005806	orf19.6462	complement(join(105954..106566,106623..106669))		1	corrected ORF	RNA-seq
cpar2_300830	contig005806	orf19.6563.1	join(177571..177734,177803..178046)		1	corrected ORF	RNA-seq
cpar2_300860	contig005806	orf19.7038	join(183769..184760,184829..184899,184978..185942)		2	corrected ORF	RNA-seq
cpar2_300970	contig005806	orf19.6568	join(204458..204520,204580..207852)		1	corrected ORF	RNA-seq
cpar2_302080	contig005806	orf19.2922	join(498148..498475,498537..498721,498817..498825,498894..498938)		3	corrected ORF	2 introns with C. albicans comparison, 1 with RNA-seq data
cpar2_302160	contig005806	orf19.4660	join(521747..521752,522166..522870)		1	corrected ORF	RNA-seq
cpar2_302210	contig005806	orf19.5299	join(530933..530945,531015..531592)		1	corrected ORF	RNA-seq
cpar2_302900	contig005806	no_id	join(696546..696793,696862..697456)		1	corrected ORF	RNA-seq
cpar2_303070	contig005806	orf19.1114	complement(join(726653..727103,727190..727233))		1	corrected ORF	RNA-seq
cpar2_303590	contig005806	orf19.3200	join(837296..837568,837621..837953)		1	corrected ORF	RNA-seq
cpar2_303770	contig005806	orf19.567	complement(join(877549..878564,878625..878643))		1	corrected ORF	RNA-seq
cpar2_304060	contig005806	orf19.944	join(972110..972132,972196..973213)		1	corrected ORF	RNA-seq
cpar2_304130	contig005806	orf19.953.1	complement(join(982094..982511,982579..982589,982711..982713))		2	corrected ORF	1 C. albicans, 1 RNA-seq
cpar2_400350	contig006372	orf19.2711.1	complement(join(87123..87819,87882..87892))		1	corrected ORF	RNA-seq
cpar2_401600	contig006372	orf19.4565	complement(join(355963..356826,356960..357022))		1	corrected ORF	RNA-seq
cpar2_401800	contig006372	orf19.3788.1	complement(join(394083..394400,394573..394575))		1	corrected ORF	RNA-seq
cpar2_401850	contig006372	orf19.2509	join(407320..407924,407993..409289)		1	corrected ORF	C. albicans
cpar2_401960	contig006372	orf19.3838	complement(join(431107..431674,431994..432076))		1	corrected ORF	RNA-seq
cpar2_401970	contig006372	no_id	complement(join(432282..434043,434106..434155))		1	corrected ORF	RNA-seq
cpar2_402180	contig006372	orf19.5647	complement(join(486291..487369,487655..487880))		1	corrected ORF	RNA-seq
cpar2_402220	contig006372	orf19.5653	join(492862..492971,493413..494808)		1	corrected ORF	RNA-seq
cpar2_402230	contig006372	orf19.5654	join(495045..495062,495122..496501)		1	corrected ORF	RNA-seq
cpar2_402260	contig006372	orf19.377	complement(join(499246..500543,500647..500689))		1	corrected ORF	C. albicans
cpar2_402440	contig006372	orf19.4182	join(533933..534036,534168..535095)		1	corrected ORF	C. albicans
cpar2_402760	contig006372	orf19.5660	complement(join(599069..600000,600062..600107))		1	corrected ORF	RNA-seq
cpar2_403320	contig006372	orf19.4575	join(725617..727547,727628..727808)		1	corrected ORF	RNA-seq
cpar2_403450	contig006372	orf19.3366.1	join(750098..750151,750425..750616)		1	corrected ORF	RNA-seq
cpar2_403980	contig006372	orf19.4879.2	join(881424..881430,881507..881874)		1	corrected ORF	RNA-seq
cpar2_404200	contig006372	orf19.7436.1	complement(join(942141..942428,942504..942548))		1	corrected ORF	RNA-seq
cpar2_404400	contig006372	orf19.5917.3	join(985254..985550,986386..986763)		1	corrected ORF	C. albicans
cpar2_404640	contig006372	orf19.7428	join(1033515..1033528,1033590..1034676)		1	corrected ORF	RNA-seq
cpar2_404680	contig006372	no_id	join(1045640..1045756,1045816..1046220)		1	corrected ORF	RNA-seq
cpar2_404880	contig006372	orf19.1634	complement(join(1099952..1101114,1101172..1101187))		1	corrected ORF	RNA-seq
cpar2_405050	contig006372	orf19.1624	join(1137023..1137041,1137102..1139428)		1	corrected ORF	RNA-seq
cpar2_405090	contig006372	orf19.1630	join(1142165..1142168,1142243..1142287,1142346..1144816)		2	corrected ORF	RNA-seq
cpar2_405140	contig006372	orf19.1618	complement(join(1151054..1153196,1153282..1153286))		1	corrected ORF	RNA-seq
cpar2_405310	contig006372	orf19.5996.1	complement(join(1210450..1210870,1211144..1211163))		1	corrected ORF	RNA-seq
cpar2_405330	contig006372	orf19.5982	complement(join(1213295..1213743,1214155..1214266))		1	corrected ORF	RNA-seq
cpar2_405350	contig006372	orf19.5985	complement(join(1215850..1216405,1216462..1216478))		1	corrected ORF	RNA-seq
cpar2_405570	contig006372	orf19.5964.2	join(1278718..1278720,1279022..1279381)		1	corrected ORF	RNA-seq
cpar2_405580	contig006372	orf19.5965	complement(join(1279640..1282906,1282983..1283000))		1	corrected ORF	RNA-seq
cpar2_405650	contig006372	orf19.5954	complement(join(1293004..1293605,1293675..1294584))		1	corrected ORF	C. albicans
cpar2_405680	contig006372	orf19.6975	complement(join(1299203..1299898,1300175..1300264))		1	corrected ORF	RNA-seq
cpar2_405840	contig006372	orf19.1750	join(1350411..1350487,1351321..1352050)		1	corrected ORF	RNA-seq
cpar2_405920	contig006372	orf19.4090.1	join(1365071..1365093,1365150..1365369)		1	corrected ORF	RNA-seq
cpar2_406130	contig006372	orf19.1400	join(1399954..1400076,1400148..1401797)		1	corrected ORF	RNA-seq
cpar2_406290	contig006372	no_id	join(1432277..1432852,1432916..1433611)		1	corrected ORF	C. albicans
cpar2_406660	contig006372	orf19.2257	complement(join(1505758..1506811,1506864..1506913))		1	corrected ORF	RNA-seq
cpar2_407550	contig006372	orf19.2179.2	complement(join(1694968..1695275,1695640..1695691))		1	corrected ORF	RNA-seq
cpar2_407750	contig006372	orf19.5348	join(1738549..1738571,1738627..1740835)		1	corrected ORF	RNA-seq
cpar2_407880	contig006372	orf19.5342.1	join(1757196..1757211,1757262..1757776)		1	corrected ORF	C. albicans
cpar2_500330	contig006139	no_id	complement(join(74441..74892,74985..74997))		1	corrected ORF	RNA-seq
cpar2_500390	contig006139	orf19.2770.1	complement(join(84929..85380,85510..85522))		1	corrected ORF	RNA-seq
cpar2_500510	contig006139	orf19.1238	join(116351..116358,116415..117885)		1	corrected ORF	RNA-seq
cpar2_500930	contig006139	orf19.1409.1	join(220924..220935,221389..221739)		1	corrected ORF	C. albicans
cpar2_501240	contig006139	orf19.3140.1	complement(join(287117..287563,287632..287634))		1	corrected ORF	RNA-seq
cpar2_501460	contig006139	orf19.4413	complement(join(342938..343384,343554..343556))		1	corrected ORF	RNA-seq
cpar2_501520	contig006139	orf19.4406	complement(join(355104..355897,355950..355986))		1	corrected ORF	RNA-seq
cpar2_501680	contig006139	orf19.4149.1	join(402829..402873,403200..403622)		1	corrected ORF	RNA-seq
cpar2_501700	contig006139	orf19.4151	complement(join(405122..407152,407217..407426))		1	corrected ORF	C. albicans
cpar2_501830	contig006139	orf19.1967	join(431920..431956,432025..432467)		1	corrected ORF	RNA-seq
cpar2_501980	contig006139	orf19.4340.1	complement(join(454251..454640,454692..454700))		1	corrected ORF	C. albicans
cpar2_502240	contig006139	orf19.3211	join(509822..509853,509908..510889)		1	corrected ORF	RNA-seq
cpar2_502430	contig006139	orf19.3991	join(555504..555675,555741..557941)		1	corrected ORF	RNA-seq
cpar2_502720	contig006139	orf19.4002	complement(join(620749..622137,622206..622226))		1	corrected ORF	RNA-seq
cpar2_503580	contig006139	orf19.1680	complement(join(824135..825985,826043..826045))		1	corrected ORF	RNA-seq
cpar2_503710	contig006139	orf19.1702	join(847159..847173,847224..847736)		1	corrected ORF	C. albicans
cpar2_503820	contig006139	orf19.5394.1	complement(join(871206..871572,871625..871635))		1	corrected ORF	RNA-seq
cpar2_504170	contig006139	orf19.5466	complement(join(951511..951915,952140..952142))		1	corrected ORF	RNA-seq
cpar2_600040	contig005504	orf19.5732	complement(join(10798..11463,11521..12327))		1	corrected ORF	RNA-seq
cpar2_600670	contig005504	orf19.5569	join(176737..176755,176827..179033,179098..179613)		2	corrected ORF	RNA-seq
cpar2_600780	contig005504	orf19.5628	join(216419..216450,216507..217344)		1	corrected ORF	RNA-seq
cpar2_600790	contig005504	orf19.5629	complement(join(217698..217953,218011..218021))		1	corrected ORF	RNA-seq
cpar2_600980	contig005504	orf19.1212	join(270862..270895,271198..272333)		1	corrected ORF	RNA-seq
cpar2_601350	contig005504	orf19.3462	complement(join(335826..336379,336433..336451))		1	corrected ORF	RNA-seq
cpar2_601830	contig005504	orf19.3504	complement(join(433820..434191,434538..434579))		1	corrected ORF	RNA-seq
cpar2_602060	contig005504	orf19.3405	join(492381..492449,492511..494055)		1	corrected ORF	RNA-seq
cpar2_602140	contig005504	orf19.686	complement(join(508123..509705,509757..509763))		1	corrected ORF	manual
cpar2_602160	contig005504	orf19.687.1	complement(join(511707..512131,512504..512510))		1	corrected ORF	RNA-seq
cpar2_602260	contig005504	orf19.3419	complement(join(532674..533901,533977..534662))		1	corrected ORF	RNA-seq
cpar2_602320	contig005504	orf19.3402	join(543626..543643,543699..544856)		1	corrected ORF	RNA-seq
cpar2_602330	contig005504	orf19.3396	complement(join(544911..545334,545389..545414))		1	corrected ORF	RNA-seq
cpar2_602530	contig005504	orf19.3426	join(595504..595518,595930..596385)		1	corrected ORF	RNA-seq
cpar2_602560	contig005504	orf19.3421.1	join(601897..601942,602003..602442)		1	corrected ORF	RNA-seq
cpar2_602580	contig005504	orf19.3415.1	join(611439..611439,611881..612275)		1	corrected ORF	RNA-seq
cpar2_602700	contig005504	orf19.3449.2	join(640414..640632,640685..641113)		1	corrected ORF	RNA-seq
cpar2_602850	contig005504	orf19.4193.1	complement(join(677099..677533,677974..677994))		1	corrected ORF	RNA-seq
cpar2_602860	contig005504	orf19.4193	complement(join(678328..678385,678450..678708,678779..678875,678938..678940))		3	corrected ORF	RNA-seq
cpar2_602870	contig005504	orf19.4192	join(679286..679331,679387..681017)		1	corrected ORF	RNA-seq
cpar2_602880	contig005504	orf19.4192.1	complement(join(681188..681643,681693..681713))		1	corrected ORF	C. albicans
cpar2_603570	contig005504	orf19.1203.1	join(850053..850055,850126..850380)		1	corrected ORF	RNA-seq
cpar2_700280	contig006110	orf19.7208	join(52180..52461,52520..53362)		1	corrected ORF	C. albicans
cpar2_700360	contig006110	orf19.7215.3	join(70254..70256,70320..70640)		1	corrected ORF	RNA-seq
cpar2_700500	contig006110	orf19.7239	join(100784..100809,100997..102968)		1	corrected ORF	RNA-seq
cpar2_700720	contig006110	orf19.5225.2	join(159068..159098,159409..159788)		1	corrected ORF	RNA-seq
cpar2_701020	contig006110	orf19.5236	complement(join(227642..228352,228416..228499))		1	corrected ORF	RNA-seq
cpar2_701350	contig006110	orf19.7335	join(283252..283295,283384..284092)		1	corrected ORF	RNA-seq
cpar2_701430	contig006110	orf19.7308	join(300366..300390,300693..302014)		1	corrected ORF	RNA-seq
cpar2_701780	contig006110	orf19.596.2	complement(join(376258..376470,376563..376622))		1	corrected ORF	C. albicans
cpar2_702290	contig006110	orf19.7048.1	complement(join(497307..497507,497578..497580))		1	corrected ORF	RNA-seq
cpar2_702400	contig006110	orf19.7043.1	join(513148..513174,513256..513492)		1	corrected ORF	RNA-seq
cpar2_702410	contig006110	orf19.7082	complement(join(513620..514411,514487..514525))		1	corrected ORF	RNA-seq
cpar2_702860	contig006110	orf19.7157	join(613799..613823,613876..614591)		1	corrected ORF	C. albicans
cpar2_703160	contig006110	orf19.6517	complement(join(676314..677450,677511..677543))		1	corrected ORF	RNA-seq
cpar2_703550	contig006110	orf19.7144	complement(join(780434..781947,782581..782815))		1	corrected ORF	RNA-seq
cpar2_703850	contig006110	orf19.6696	join(838539..838771,838830..838860)		1	corrected ORF	RNA-seq
cpar2_703930	contig006110	orf19.7195	complement(join(856248..856727,856778..856819))		1	corrected ORF	C. albicans
cpar2_704160	contig006110	orf19.5137.1	join(912871..912922,913131..913179,913248..913647)		2	corrected ORF	RNA-seq
cpar2_704310	contig006110	orf19.5147	join(942263..942317,942382..944288)		1	corrected ORF	RNA-seq
cpar2_800470	contig005807	orf19.7509.1	complement(join(122191..122424,122720..122782))		1	corrected ORF	RNA-seq
cpar2_800480	contig005807	orf19.7509.2	complement(join(123208..123230,123296..123512))		1	corrected ORF	RNA-seq
cpar2_800640	contig005807	orf19.2598	join(168169..168189,168254..168913)		1	corrected ORF	RNA-seq
cpar2_800730	contig005807	orf19.2614	complement(join(186409..187088,187145..187151))		1	corrected ORF	RNA-seq
cpar2_800880	contig005807	orf19.3251	join(211403..211405,211459..211971)		1	corrected ORF	RNA-seq
cpar2_801270	contig005807	orf19.3735	complement(join(290907..292463,292531..292647))		1	corrected ORF	C. albicans
cpar2_801460	contig005807	orf19.2613	join(338565..338573,338629..339621)		1	corrected ORF	RNA-seq
cpar2_801880	contig005807	orf19.4931.1	complement(join(437963..438247,438473..438583))		1	corrected ORF	RNA-seq
cpar2_802010	contig005807	orf19.4393	join(473924..474010,474155..475468)		1	corrected ORF	RNA-seq
cpar2_802040	contig005807	orf19.2379	complement(join(479838..481596,481677..481726))		1	corrected ORF	RNA-seq
cpar2_802200	contig005807	orf19.2393	join(502524..503152,503206..503243,503330..504048)		2	corrected ORF	RNA-seq
cpar2_802220	contig005807	orf19.2397.3	join(505870..506104,506163..506884)		1	corrected ORF	RNA-seq
cpar2_802520	contig005807	orf19.2416.1	join(563686..563688,563772..564200)		1	corrected ORF	RNA-seq
cpar2_802570	contig005807	orf19.2863.1	complement(join(569592..570048,570103..570209))		1	corrected ORF	RNA-seq
cpar2_802590	contig005807	orf19.2864.1	complement(join(571461..571861,572195..572243))		1	corrected ORF	RNA-seq
cpar2_802610	contig005807	orf19.2423	complement(join(574192..576144,576209..576289))		1	corrected ORF	RNA-seq
cpar2_802670	contig005807	orf19.171	complement(join(592745..593124,594077..595385))		1	corrected ORF	RNA-seq
cpar2_802830	contig005807	orf19.2546	join(632942..632944,633002..634546)		1	corrected ORF	RNA-seq
cpar2_803140	contig005807	orf19.3223.1	join(692460..692463,692571..692863)		1	corrected ORF	RNA-seq
cpar2_803150	contig005807	orf19.3223	join(693393..693442,693578..694427)		1	corrected ORF	RNA-seq
cpar2_803290	contig005807	orf19.2318.1	complement(join(733668..734345,734396..734434))		1	corrected ORF	C. albicans
cpar2_803310	contig005807	orf19.2322.3	join(736217..736432,736487..736921)		1	corrected ORF	RNA-seq
cpar2_803400	contig005807	orf19.6265.1	complement(join(756627..757015,757371..757380))		1	corrected ORF	RNA-seq
cpar2_803420	contig005807	orf19.6264.4	join(758456..758461,758749..758898)		1	corrected ORF	RNA-seq
cpar2_803430	contig005807	orf19.6264.3	complement(join(759461..759970,760058..760081))		1	corrected ORF	RNA-seq
cpar2_803570	contig005807	orf19.1840	join(790243..790284,790352..794341)		1	corrected ORF	RNA-seq
cpar2_803630	contig005807	orf19.4826	join(807216..807245,807501..808568)		1	corrected ORF	RNA-seq
cpar2_803930	contig005807	orf19.4723	complement(join(885792..886437,886501..886718))		1	corrected ORF	RNA-seq
cpar2_804010	contig005807	orf19.3273	complement(join(896539..896715,896768..897454))		1	corrected ORF	RNA-seq
cpar2_804440	contig005807	orf19.4730	complement(join(978532..979279,979335..979348))		1	corrected ORF	RNA-seq
cpar2_804520	contig005807	orf19.1139	join(999399..999429,1000261..1002971)		1	corrected ORF	RNA-seq
cpar2_804710	contig005807	orf19.5104	join(1052468..1052532,1052598..1053039)		1	corrected ORF	RNA-seq
cpar2_805380	contig005807	orf19.7076	join(1203635..1203667,1204338..1205669)		1	corrected ORF	RNA-seq
cpar2_805440	contig005807	orf19.6534.2	join(1221320..1221324,1221384..1223442)		1	corrected ORF	RNA-seq
cpar2_805480	contig005807	orf19.6539	complement(join(1230189..1231673,1231762..1231764))		1	corrected ORF	RNA-seq
cpar2_805610	contig005807	orf19.6582	join(1257912..1257914,1257981..1258029,1258101..1258846)		2	corrected ORF	RNA-seq
cpar2_805700	contig005807	orf19.1604	complement(join(1288023..1290796,1291018..1291084))		1	corrected ORF	RNA-seq
cpar2_805730	contig005807	orf19.2168.3	complement(join(1298466..1298948,1299099..1299149))		1	corrected ORF	RNA-seq
cpar2_805740	contig005807	orf19.2167	complement(join(1299710..1301074,1301133..1301150))		1	corrected ORF	RNA-seq
cpar2_805830	contig005807	orf19.5869	join(1319813..1319830,1319989..1321134)		1	corrected ORF	RNA-seq
cpar2_805840	contig005807	orf19.5870	complement(join(1321222..1322091,1322183..1322197))		1	corrected ORF	RNA-seq
cpar2_805960	contig005807	orf19.5904	join(1358355..1358356,1358707..1359283)		1	corrected ORF	RNA-seq
cpar2_806050	contig005807	orf19.5893	complement(join(1381988..1382580,1382777..1382825))		1	corrected ORF	RNA-seq
cpar2_806090	contig005807	orf19.5886	complement(join(1392314..1392782,1393001..1393014))		1	corrected ORF	RNA-seq
cpar2_806140	contig005807	orf19.5876	join(1401972..1401984,1402050..1402390)		1	corrected ORF	RNA-seq
cpar2_806230	contig005807	orf19.2173	join(1417527..1417532,1417733..1418896)		1	corrected ORF	RNA-seq
cpar2_806400	contig005807	no_id	join(1459451..1465820,1465905..1466356)		1	corrected ORF	RNA-seq
cpar2_806820	contig005807	orf19.7382	complement(join(1575258..1576291,1576491..1576689))		1	corrected ORF	RNA-seq
cpar2_806910	contig005807	orf19.356	complement(join(1599784..1600534,1600589..1600641))		1	corrected ORF	RNA-seq
cpar2_806920	contig005807	orf19.6998	complement(join(1601372..1602074,1602133..1602164))		1	corrected ORF	RNA-seq
cpar2_807420	contig005807	orf19.5943.1	join(1730439..1730456,1730820..1731656)		1	corrected ORF	RNA-seq
cpar2_807530	contig005807	orf19.1658	join(1755733..1756325,1757214..1758312)		1	corrected ORF	RNA-seq
cpar2_807560	contig005807	orf19.5927	complement(join(1761521..1761936,1762218..1762230))		1	corrected ORF	RNA-seq
cpar2_807660	contig005807	orf19.1647	join(1779000..1779227,1779289..1780098)		1	corrected ORF	C. albicans
cpar2_807760	contig005807	orf19.6753	join(1803031..1803046,1803101..1803711)		1	corrected ORF	RNA-seq
cpar2_807860	contig005807	orf19.6187	join(1815658..1816599,1816654..1817901)		1	corrected ORF	RNA-seq
cpar2_807920	contig005807	orf19.6738	complement(join(1836417..1837848,1837909..1837970))		1	corrected ORF	RNA-seq
cpar2_807990	contig005807	orf19.6747	complement(join(1849516..1850466,1850521..1850535))		1	corrected ORF	RNA-seq
cpar2_808150	contig005807	orf19.6718	join(1886736..1886788,1886842..1887544)		1	corrected ORF	RNA-seq
cpar2_808580	contig005807	orf19.6822	complement(join(1977358..1978239,1978306..1978308))		1	corrected ORF	RNA-seq
cpar2_808900	contig005807	orf19.6787	join(2052983..2052999,2053067..2053463)		1	corrected ORF	RNA-seq
cpar2_808910	contig005807	orf19.6786	complement(join(2053696..2054617,2054674..2054798))		1	corrected ORF	RNA-seq
cpar2_100580	contig005569	orf19.4305.1	join(98569..98596,98669..98946)		1	new_intron	RNA-seq
cpar2_100640	contig005569	orf19.3942.1	complement(join(110830..111106,111597..111598))		1	new_intron	RNA-seq
cpar2_101040	contig005569	orf19.3972	join(189596..189620,189691..190088)		1	new_intron	RNA-seq
cpar2_102130	contig005569	no_id	join(489828..48§9830,490123..490335)		1	new_intron	RNA-seq
cpar2_102440	contig005569	orf19.242.2	complement(join(563928..564113,564190..564192))		1	new_intron	RNA-seq
cpar2_102860	contig005569	orf19.233.1	complement(join(656235..656455,656529..656615,656677..656707))		2	new_intron	RNA-seq
cpar2_102890	contig005569	orf19.227	join(660972..660973,661058..661238)		1	new_intron	RNA-seq
cpar2_105830	contig005569	orf19.6062.3	join(1269233..1269334,1269459..1269815)		1	new_intron	RNA-seq
cpar2_107040	contig005569	orf19.1058	complement(join(1496812..1497256,1497378..1497805))		1	new_intron	C. albicans
cpar2_107920	contig005569	orf19.446.2	complement(join(1669886..1670124,1670185..1670212))		1	new_intron	RNA-seq
cpar2_107930	contig005569	orf19.446.1	complement(join(1670808..1671004,1671101..1671140))		1	new_intron	RNA-seq
cpar2_108200	contig005569	orf19.3663.1	join(1729588..1729615,1729846..1730087)		1	new_intron	RNA-seq
cpar2_108330	contig005569	no_id	complement(join(1754152..1754393,1754489..1754516))		1	new_intron	RNA-seq
cpar2_108440	contig005569	orf19.2965.1	complement(join(1786650..1786699,1786754..1786895))		1	new_intron	RNA-seq
cpar2_200520	contig005809	no_id	join(77848..78399,78662..78817)		1	new_intron	RNA-seq
cpar2_202370	contig005809	orf19.479.2	join(442892..442925,442986..443605)		1	new_intron	RNA-seq
cpar2_202550	contig005809	orf19.4375.1	join(487723..487725,488100..488282)		1	new_intron	RNA-seq
cpar2_203260	contig005809	orf19.1848.1	complement(join(648745..648957,649015..649017))		1	new_intron	RNA-seq
cpar2_204110	contig005809	orf19.6313.2	join(829949..830000,830055..830362)		1	new_intron	RNA-seq
cpar2_209920	contig005809	orf19.5210.1	complement(join(2126993..2127139,2127555..2127611))		1	new_intron	RNA-seq
cpar2_211300	contig005809	orf19.836.1	complement(join(2405322..2405366,2405421..2405495,2405549..2405620,2405692..2405721))		3	new_intron	RNA-seq
cpar2_213170	contig005809	orf19.2066.1	join(2814954..2815017,2815298..2815437)		1	new_intron	RNA-seq
cpar2_214070	contig005809	orf19.1448.1	complement(join(2999937..3000190,3000323..3000344))		1	new_intron	RNA-seq
cpar2_302050	contig005806	orf19.3123.2	join(493136..493214,493280..493316,493384..493498,493606..493821)		3	new_intron	RNA-seq
cpar2_400330	contig006372	orf19.2713	join(82164..82262,82640..84586)		1	new_intron	C. albicans
cpar2_400800	contig006372	orf19.2707.1	complement(join(164071..164265,164416..164427))		1	new_intron	RNA-seq
cpar2_400930	contig006372	orf19.4647	join(196562..196658,196739..196977,197031..197630)		2	new_intron	RNA-seq
cpar2_502040	contig006139	orf19.2639.1	complement(join(460326..460462,460521..460746,460808..460819))		2	new_intron	1 C. albicans, 1 RNA-seq
cpar2_600420	contig005504	orf19.1075.1	join(95894..95924,95980..96119)		1	new_intron	RNA-seq
cpar2_601440	contig005504	orf19.3477	complement(join(355224..356685,356760..356962))		1	new_intron	RNA-seq
cpar2_602710	contig005504	orf19.3450.1	join(641443..641685,641738..642157)		1	new_intron	RNA-seq
cpar2_603230	contig005504	orf19.114	complement(join(760486..762290,762351..762387))		1	new_intron	RNA-seq
cpar2_700380	contig006110	orf19.4980	complement(join(73413..74800,75050..75368))		1	new_intron	RNA-seq
cpar2_701820	contig006110	orf19.6286.2	join(383582..383584,384175..384420)		1	new_intron	RNA-seq
cpar2_702590	contig006110	orf19.6551.1	join(551598..551719,551773..551920)		1	new_intron	RNA-seq
cpar2_803070	contig005807	orf19.2533.1	join(677622..677624,677699..677956)		1	new_intron	C. albicans
cpar2_805300	contig005807	orf19.6559	join(1187351..1188256,1188513..1189121)		1	new_intron	RNA-seq
cpar2_805920	contig005807	no_id	complement(join(1350167..1350306,1350396..1350426))		1	new_intron	RNA-seq
cpar2_807220	contig005807	orf19.7360	join(1664593..1664625,1664686..1664985)		1	new_intron	RNA-seq
					386	No of genes
